# Supplementary material for: LDL cholesterol is associated with higher AD neuropathology burden independent of APOE
Source: PubMed Central journal article supplement — J Neurol Neurosurg Psychiatry. 2022 Jun 30;93(9):930–8. doi: 10.1136/jnnp-2021-328164 (PMC9380478; doi:10.1136/jnnp-2021-328164), 2022-06-30
Supplement: jnnp-2021-328164supp002.pdf [file jnnp-2021-328164supp002.pdf]

## Supplementary Figures

### Circulating LDL cholesterol before dementia onset is associated with higher AD neuropathology burden independent of *APOE*

#### Authors

Aliza P. Wingo<sup>1,2</sup>, Selina M. Vattathil<sup>3</sup>, Jiaqi, Liu<sup>3</sup>, Wen Fan<sup>3</sup>, David J. Cutler<sup>4</sup>, Allan I. Levey<sup>3,5</sup>, Julie A. Schneider<sup>6</sup>, David A. Bennett<sup>6</sup>, Thomas S. Wingo<sup>3,4,5,#</sup>

#### Affiliations

<sup>1</sup>Division of Mental Health, Atlanta VA Medical Center, Decatur, GA 30033, USA

<sup>2</sup>Department of Psychiatry, Emory University School of Medicine, Atlanta, GA 30322, USA

<sup>3</sup>Department of Neurology, Emory University School of Medicine, Atlanta, GA 30322, USA

<sup>4</sup>Department of Human Genetics, Emory University School of Medicine, Atlanta, GA 30322, USA

<sup>5</sup>Goizueta Alzheimer's Disease Center, Emory University School of Medicine, Atlanta, GA 30322, USA

<sup>6</sup>Rush Alzheimer's Disease Center, Rush University Medical Center, Chicago, Illinois, USA

**Supplementary Figure 1.** Results for non-significant association testing between longitudinally measured LDL-C and neuropathologies in individuals with NCI or MCI at baseline with censoring of LDL-C for a diagnosis of either dementia. Each neuropathology was considered in a separate linear mixed model stratified by *APOE* genotype and adjusted for relevant covariates. Final significance was determined by meta-analysis shown by in the forest plot, and the nominal p-value and FDR p-values are given. Results of each *APOE* genotype are shown with their sample size, standardized mean difference estimate (small vertical black line), the 95% confidence interval (CI) of the standardized mean difference estimate (horizontal black line), and their relative contribution to the meta-analysis (gray shaded box around the standardized mean difference estimate). The result of the fixed-effect meta-analysis is shown as a vertical dotted line and the 95% CI as a diamond. Measures of the heterogeneity between groups are given,  $I^2$ , and the residual heterogeneity,  $\tau^2$ , and estimated p-value are given. The standardized mean difference may be considered as the difference in the neuropathology score per unit of blood lipid measured.

### The Relationship between LDL-C and Neuropathology

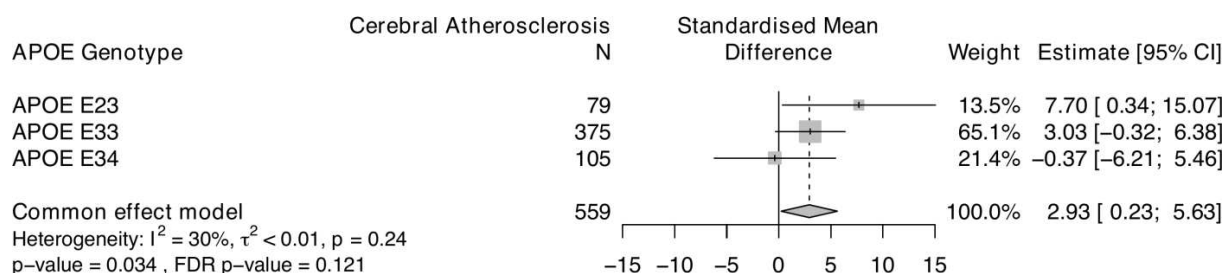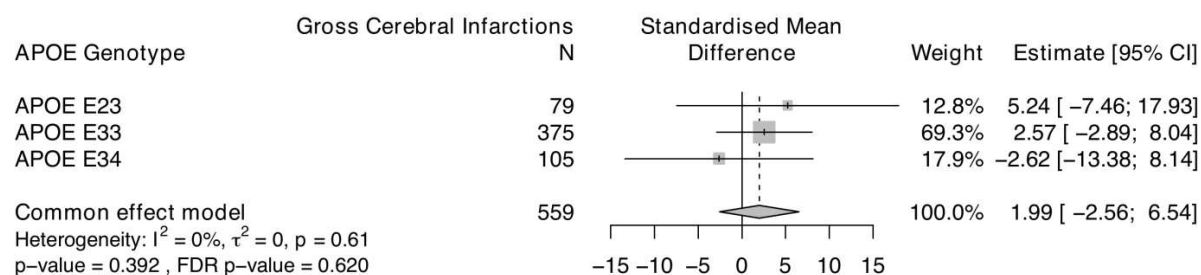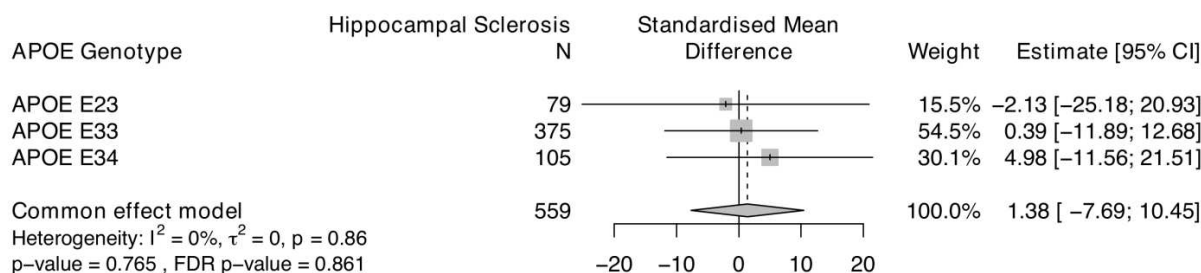

Supplementary Figure 1 – part 1 of 2

## The Relationship between LDL-C and Neuropathology

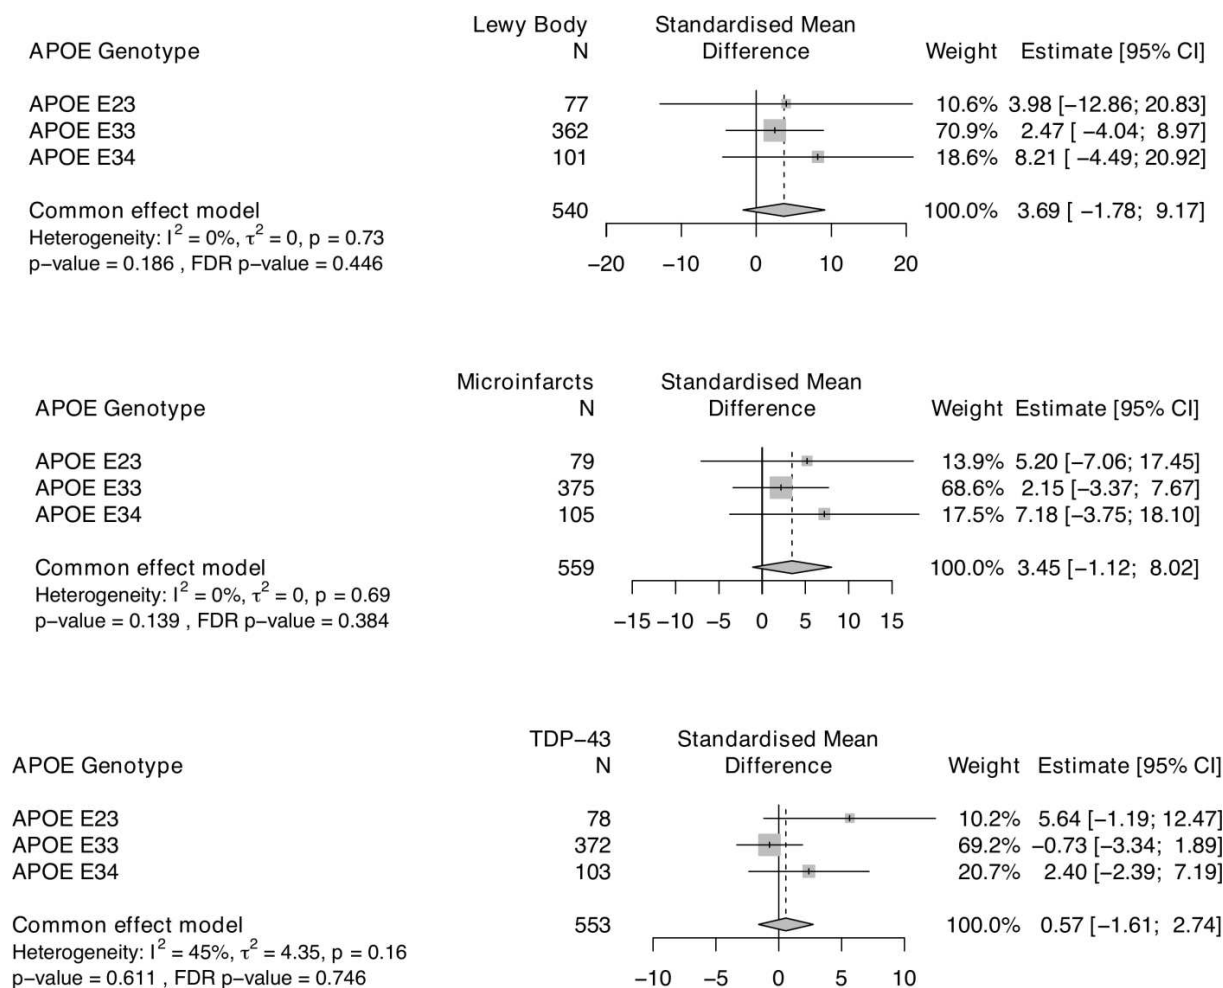

Supplementary Figure 1 – part 2 of 2

**Supplementary Figure 2.** Results for significant association testing between longitudinally measured HDL-C and neuropathologies in individuals with NCI or MCI at baseline with censoring of LDL-C for a diagnosis of either dementia. Each neuropathology was considered in a separate linear mixed model stratified by *APOE* genotype and adjusted for relevant covariates. Final significance was determined by meta-analysis and is shown in by forest plot following the same layout as described in Supplementary Figure 1.

### The Relationship between HDL-C and Neuropathology

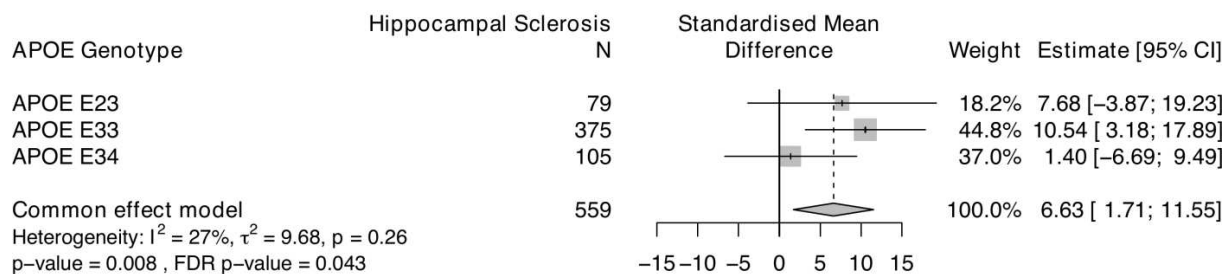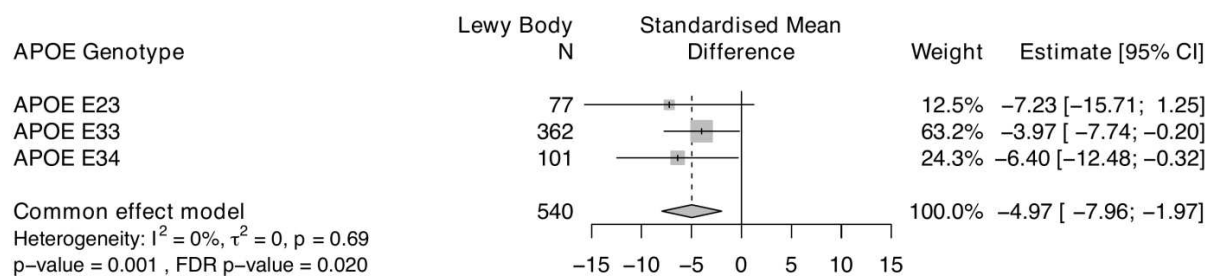

Supplementary Figure 2

**Supplementary Figure 3.** Results for non-significant association testing between longitudinally measured HDL-C and neuropathologies in individuals with NCI or MCI at baseline with censoring of HDL-C for a diagnosis of either dementia. Each neuropathology was considered in a separate linear mixed model stratified by *APOE* genotype and adjusted for relevant covariates. Final significance was determined by meta-analysis and is shown in by forest plot following the same layout as described in Supplementary Figure 1.

### The Relationship between HDL-C and Neuropathology

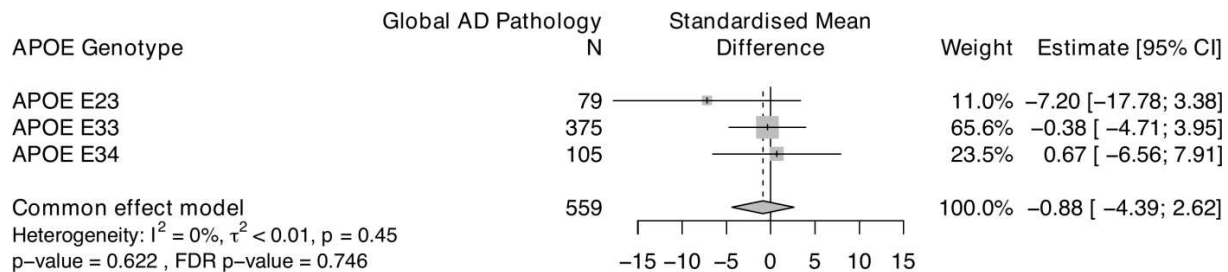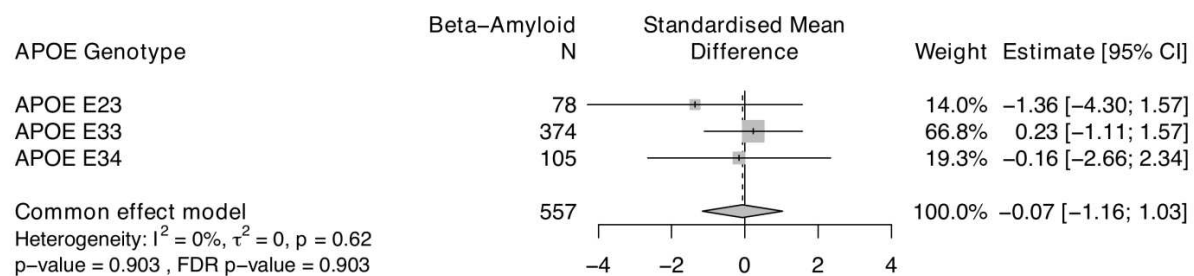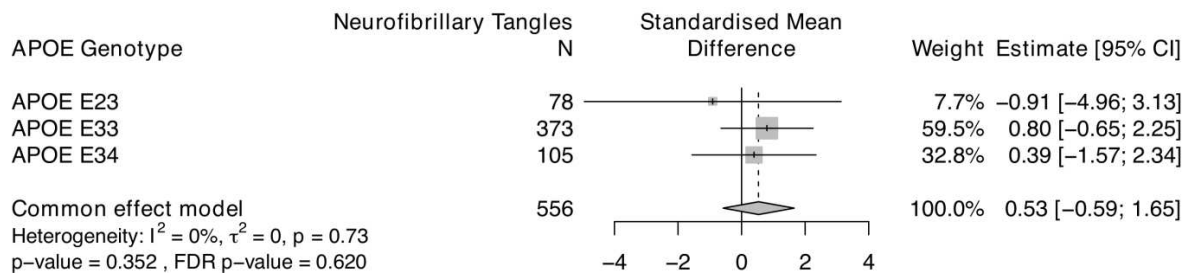

Supplementary Figure 3 – part 1 of 4

## The Relationship between HDL-C and Neuropathology

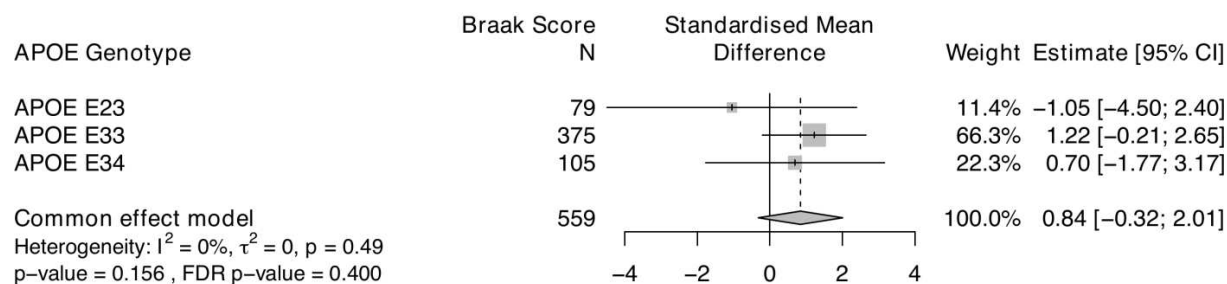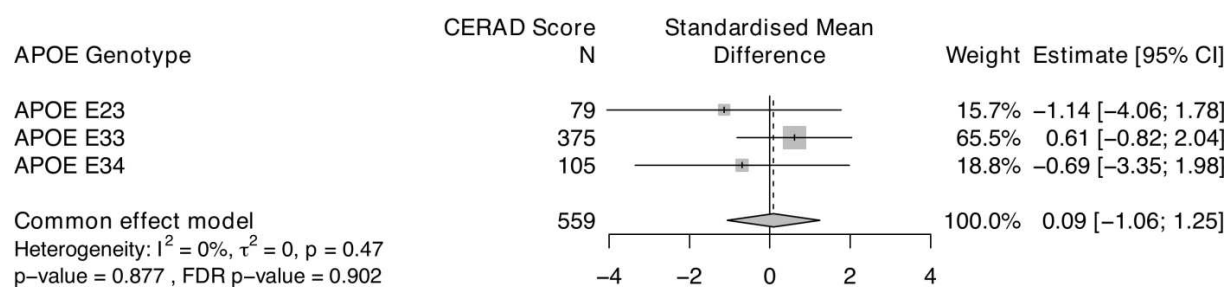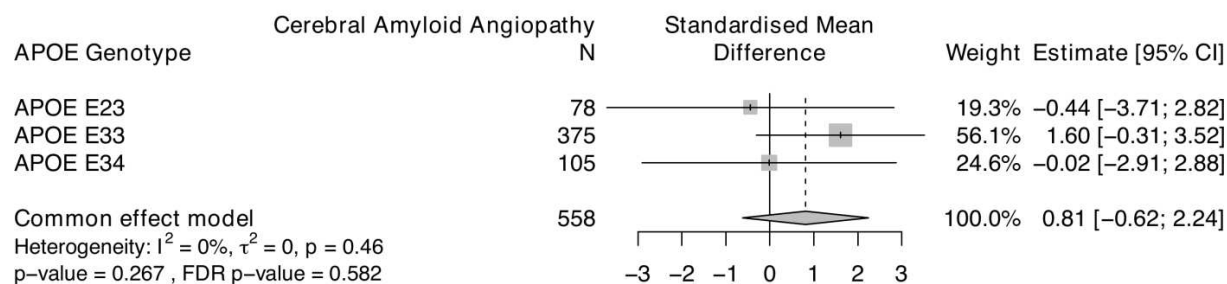

Supplementary Figure 3 – part 2 of 4



## The Relationship between HDL-C and Neuropathology

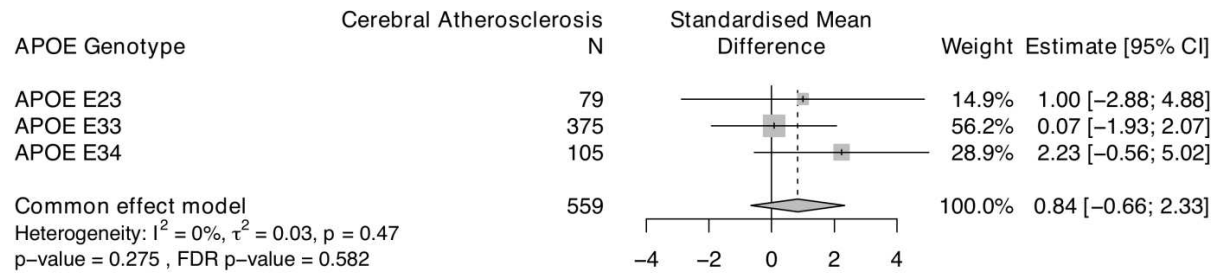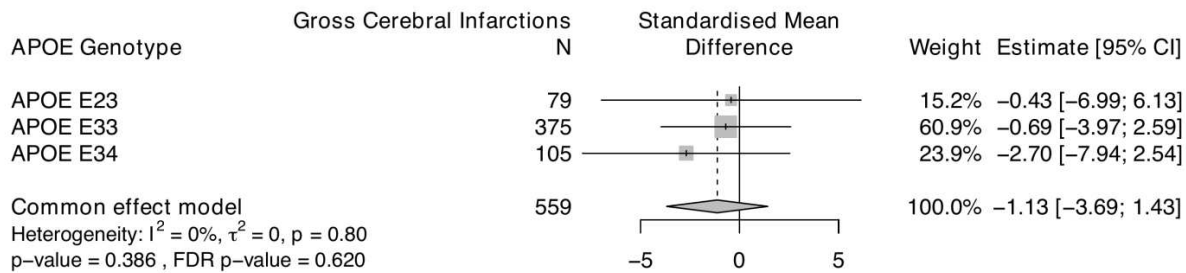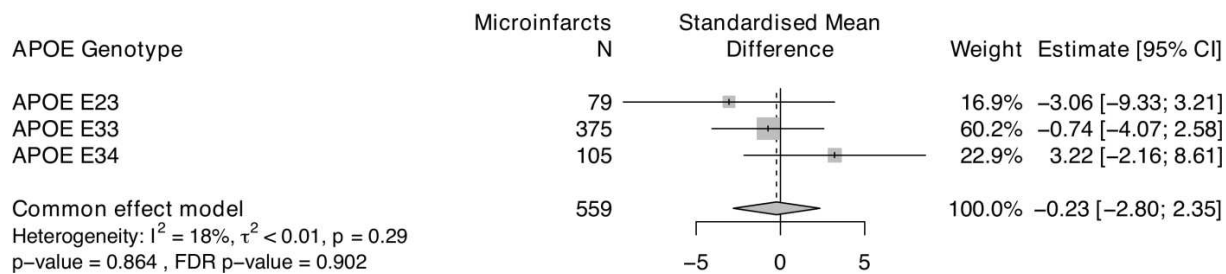

## Supplementary Figure 3 – part 3 of 4

## The Relationship between HDL-C and Neuropathology

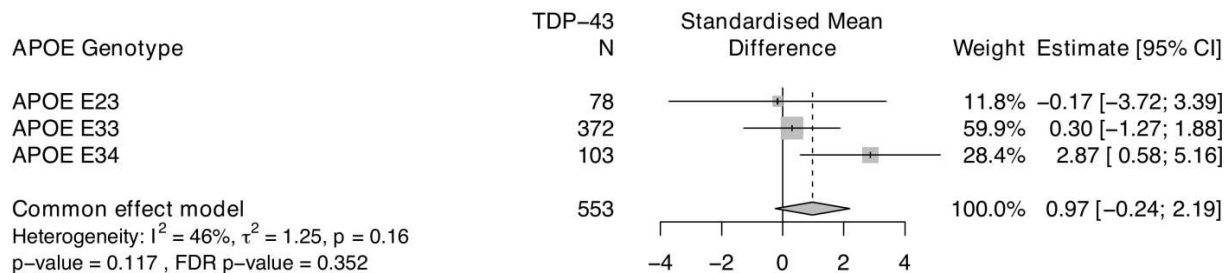

## Supplementary Figure 3 – part 4 of 4

**Supplementary Figure 4.** Results for association testing between longitudinally measured TG and neuropathologies in individuals with NCI or MCI at baseline with censoring of TG for a diagnosis of either dementia. Each neuropathology was considered in a separate linear mixed model stratified by *APOE* genotype and adjusted for relevant covariates. Final significance was determined by meta-analysis and is shown in by forest plot following the same layout as described in Supplementary Figure 1.

#### The Relationship between TG and Neuropathology

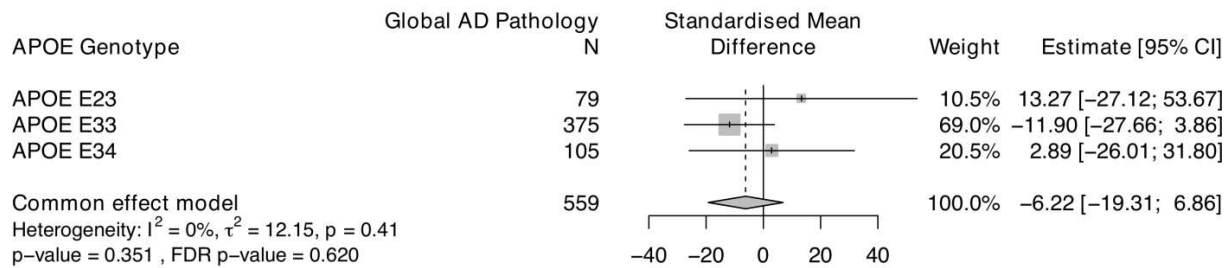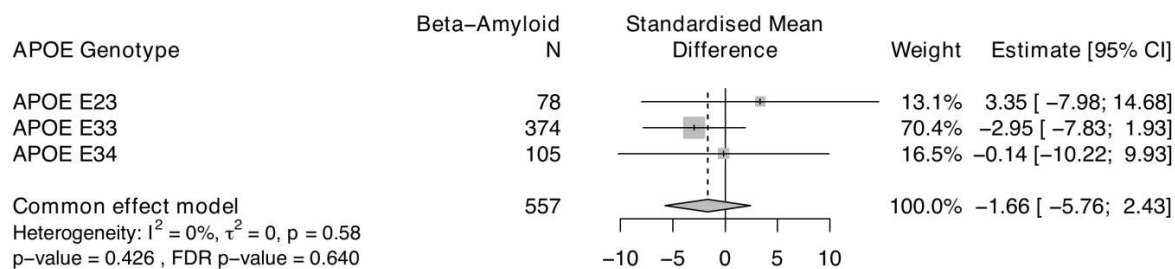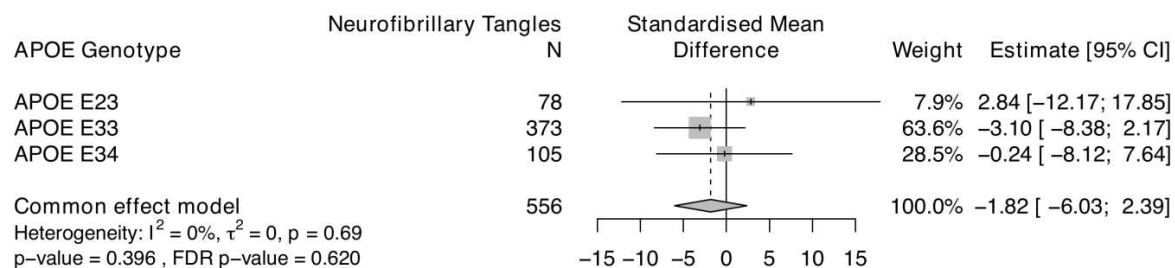

Supplementary Figure 4 – part 1 of 4



## The Relationship between TG and Neuropathology

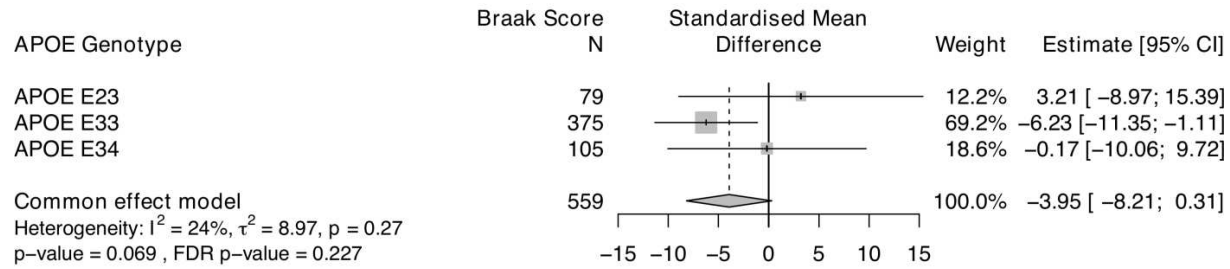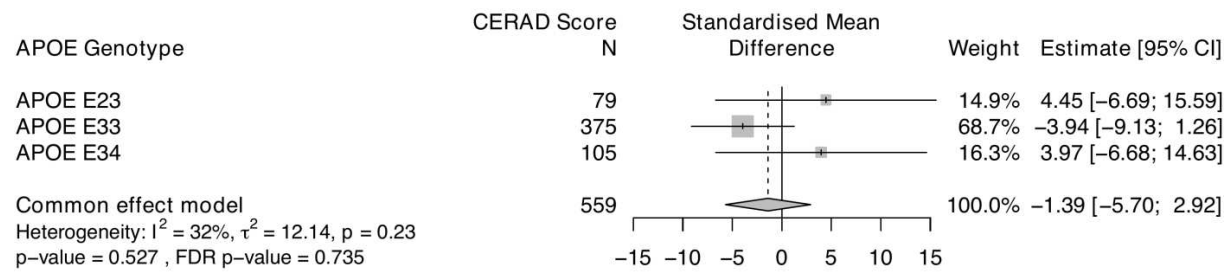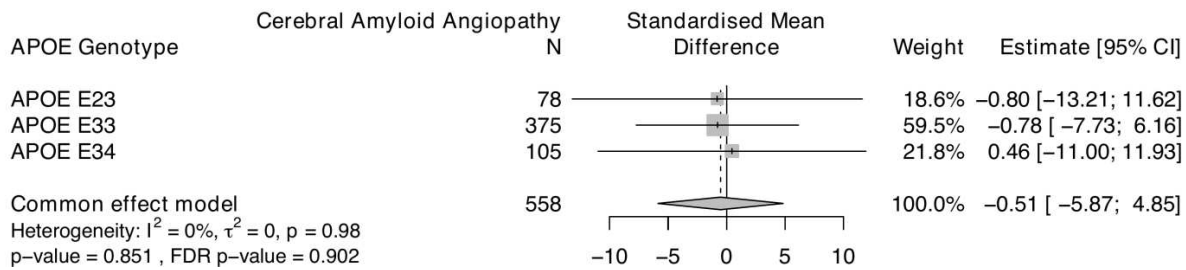

Supplementary Figure 4 – part 2 of 4

## The Relationship between TG and Neuropathology

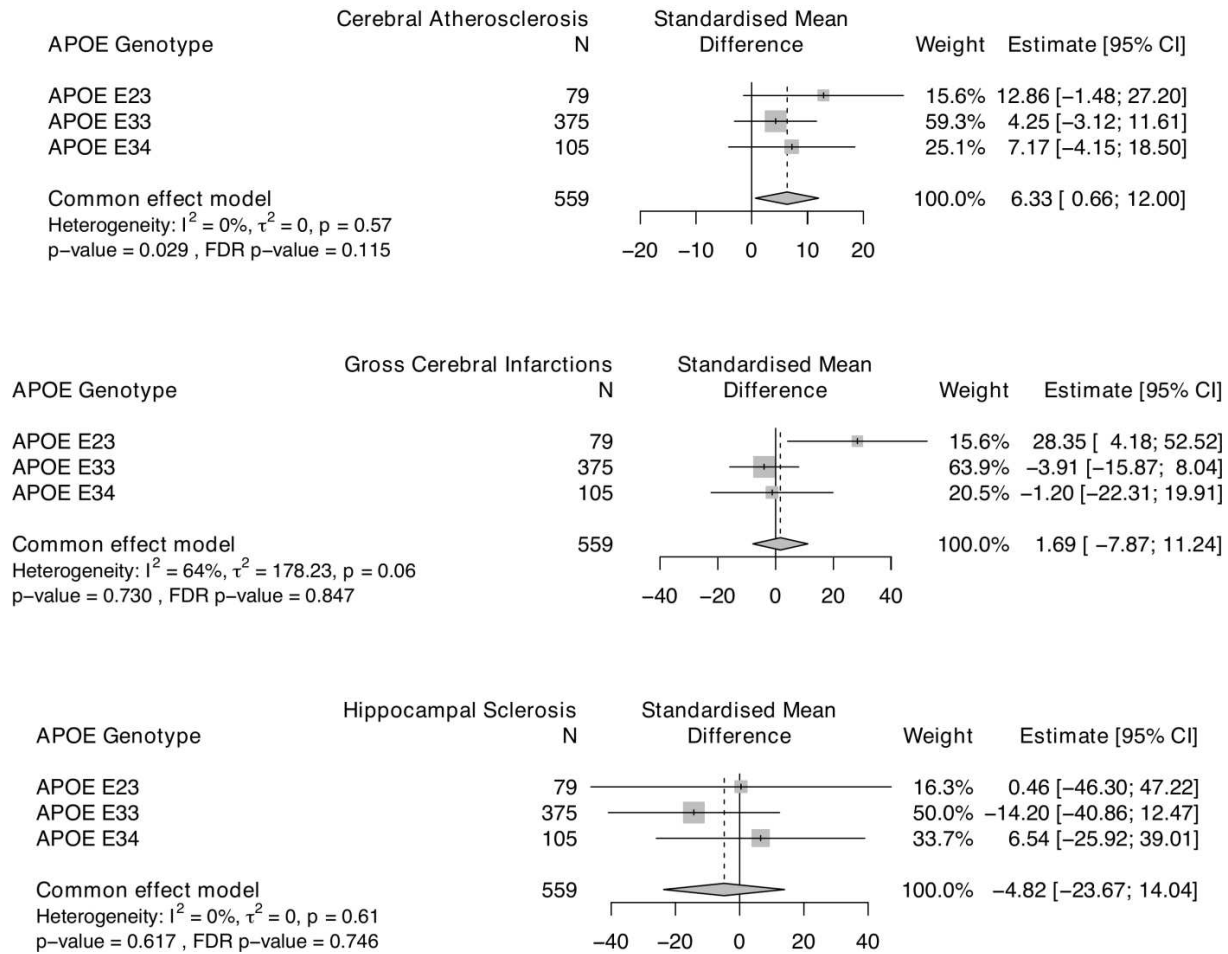

Supplementary Figure 4 – part 3 of 4

## The Relationship between TG and Neuropathology

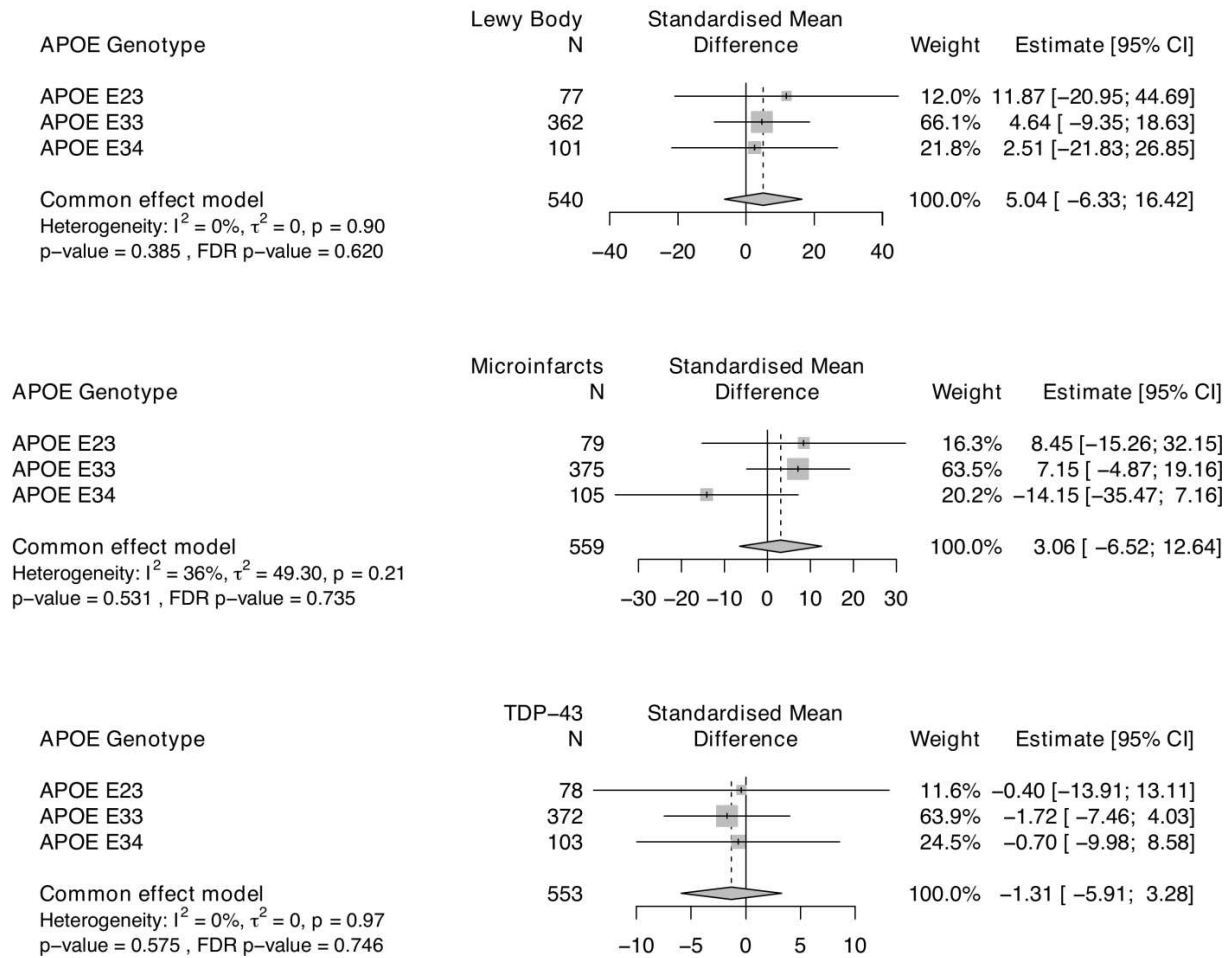

Supplementary Figure 4 – part 4 of 4

**Supplementary Figure 5.** Results for non-significant association testing between longitudinally measured LDL-C and neuropathologies in individuals with NCI at baseline with censoring of LDL-C for a diagnosis of either MCI or dementia. Each neuropathology was considered in a separate linear mixed model stratified by *APOE* genotype and adjusted for relevant covariates. Final significance was determined by meta-analysis and is shown in by forest plot following the same layout as described in Supplementary Figure 1.

### The Relationship between LDL-C and Neuropathology

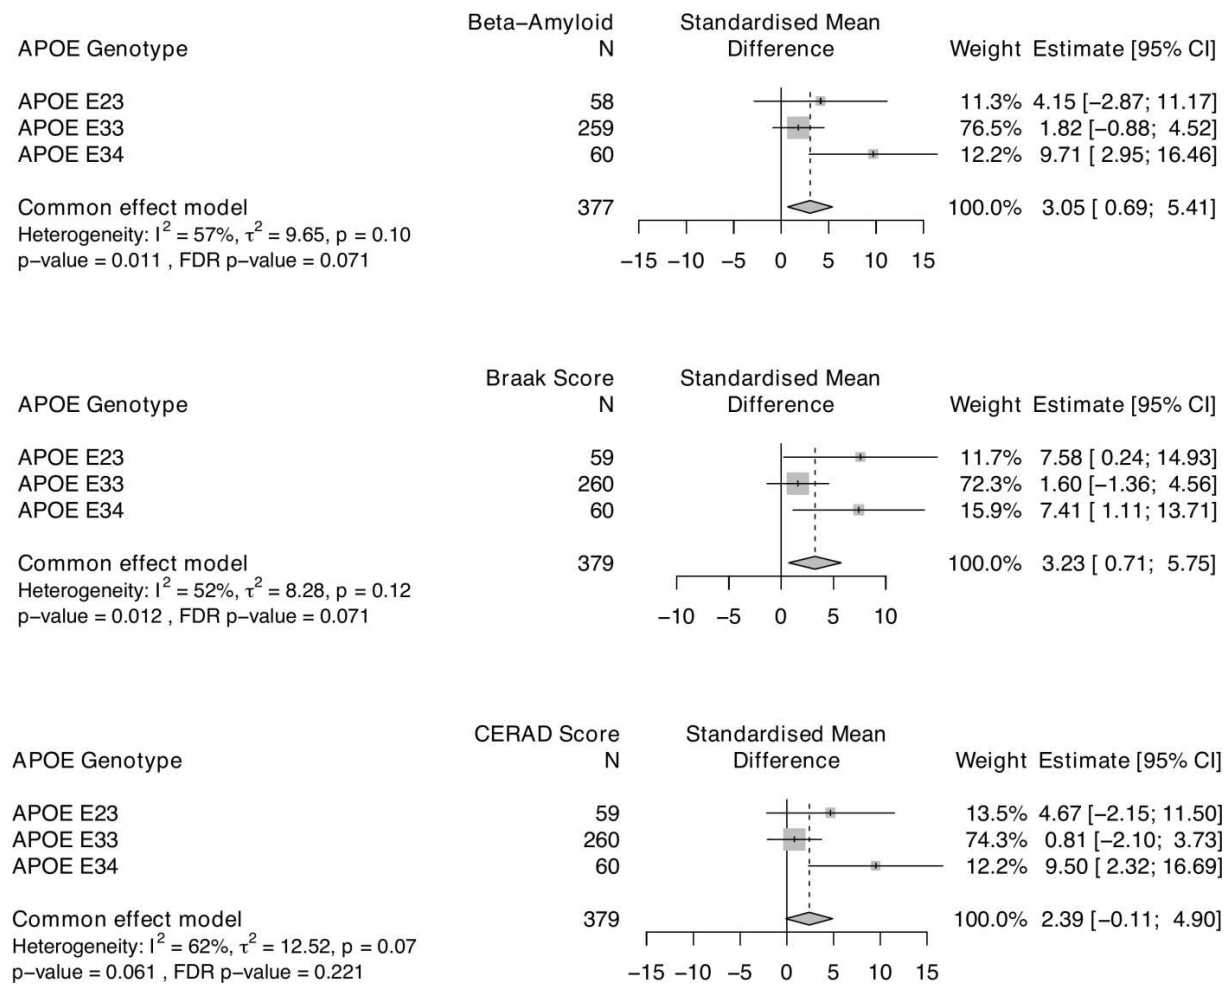

Supplementary Figure 5 – part 1 of 3

## The Relationship between LDL-C and Neuropathology

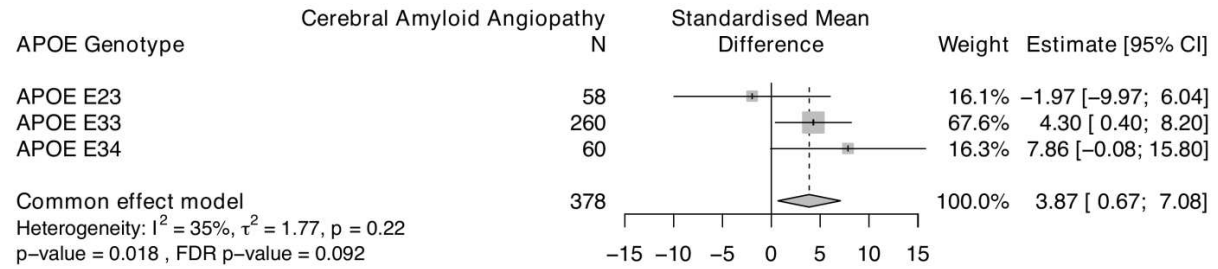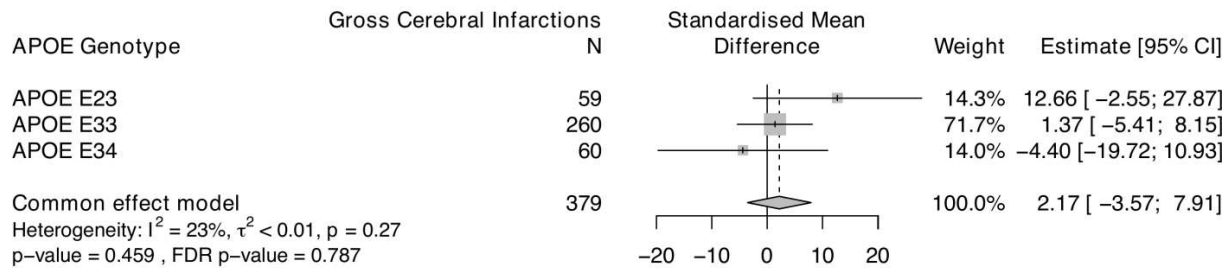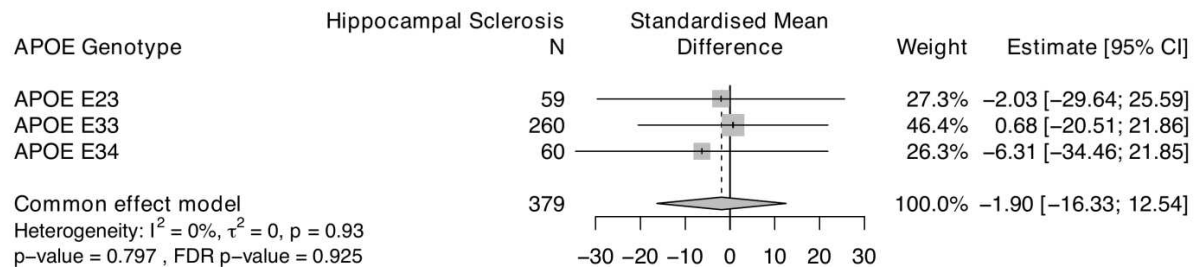

Supplementary Figure 5 – part 2 of 3

## The Relationship between LDL-C and Neuropathology

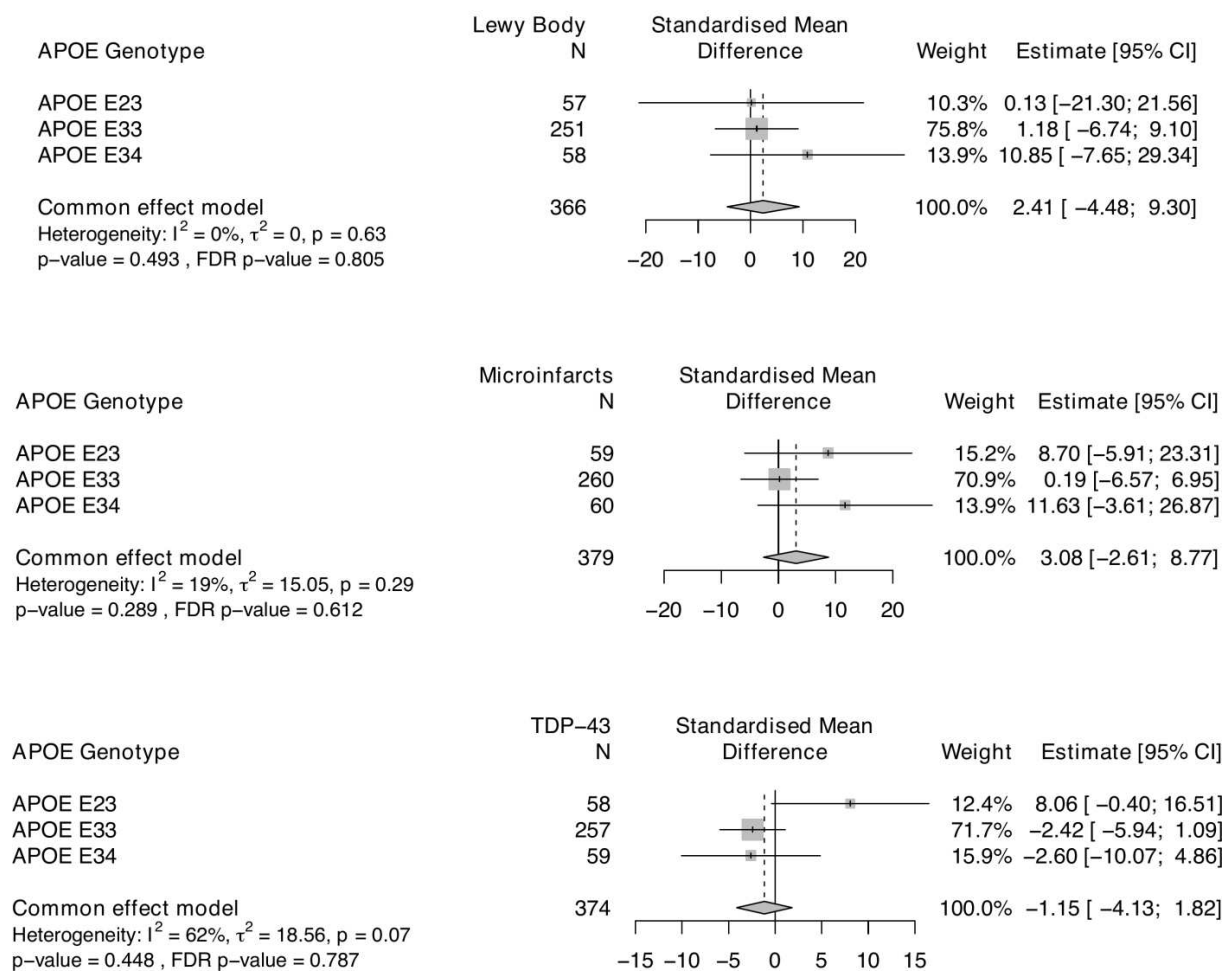

Supplementary Figure 5 – part 3 of 3



**Supplementary Figure 6.** Results for significant association testing between longitudinally measured HDL-C and neuropathologies in individuals with NCI at baseline with censoring of HDL-C for a diagnosis of either MCI or dementia. Each neuropathology was considered in a separate linear mixed model stratified by *APOE* genotype and adjusted for relevant covariates. Final significance was determined by meta-analysis and is shown in by forest plot following the same layout as described in Supplementary Figure 1.

The Relationship between HDL-C and Neuropathology

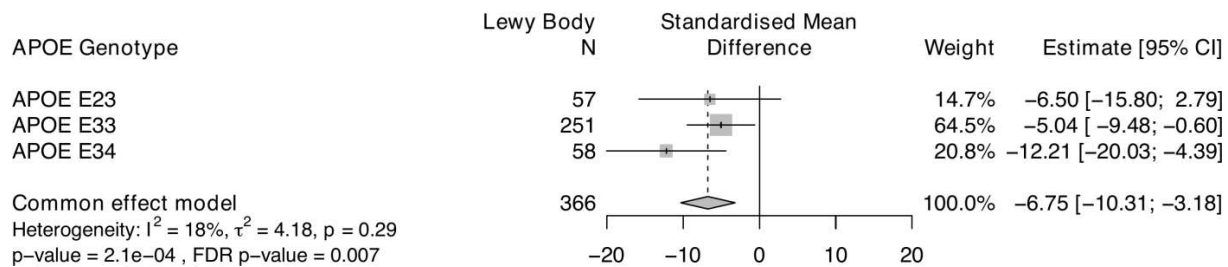

Supplementary Figure 6

**Supplementary Figure 7.** Results for non-significant association testing between longitudinally measured HDL-C and neuropathologies in individuals with NCI at baseline with censoring of HDL-C for a diagnosis of either MCI or dementia. Each neuropathology was considered in a separate linear mixed model stratified by *APOE* genotype and adjusted for relevant covariates. Final significance was determined by meta-analysis and is shown in by forest plot following the same layout as described in Supplementary Figure 1.

### The Relationship between HDL-C and Neuropathology

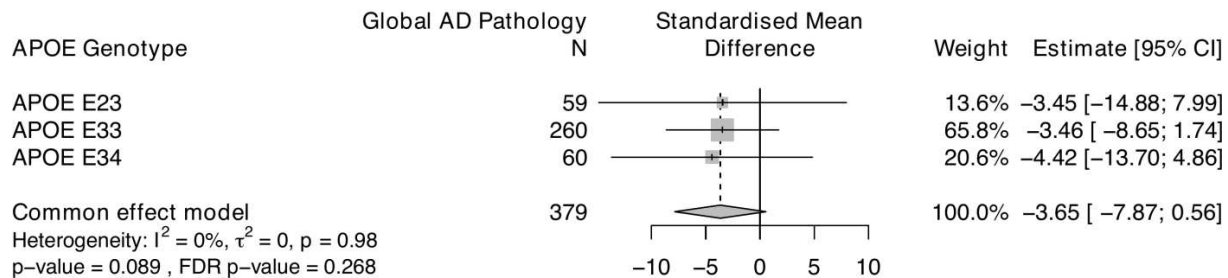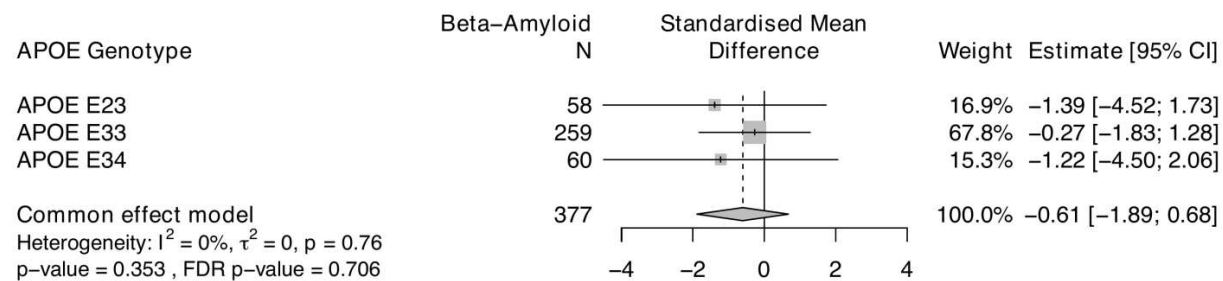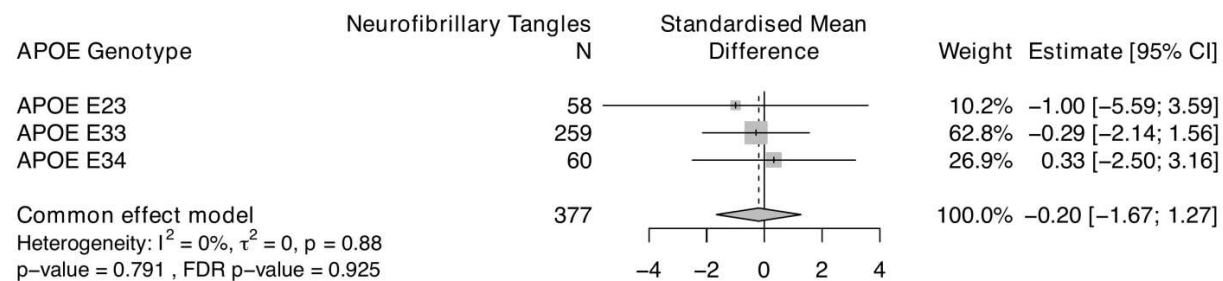

Supplementary Figure 7 – part 1 of 4

## The Relationship between HDL-C and Neuropathology

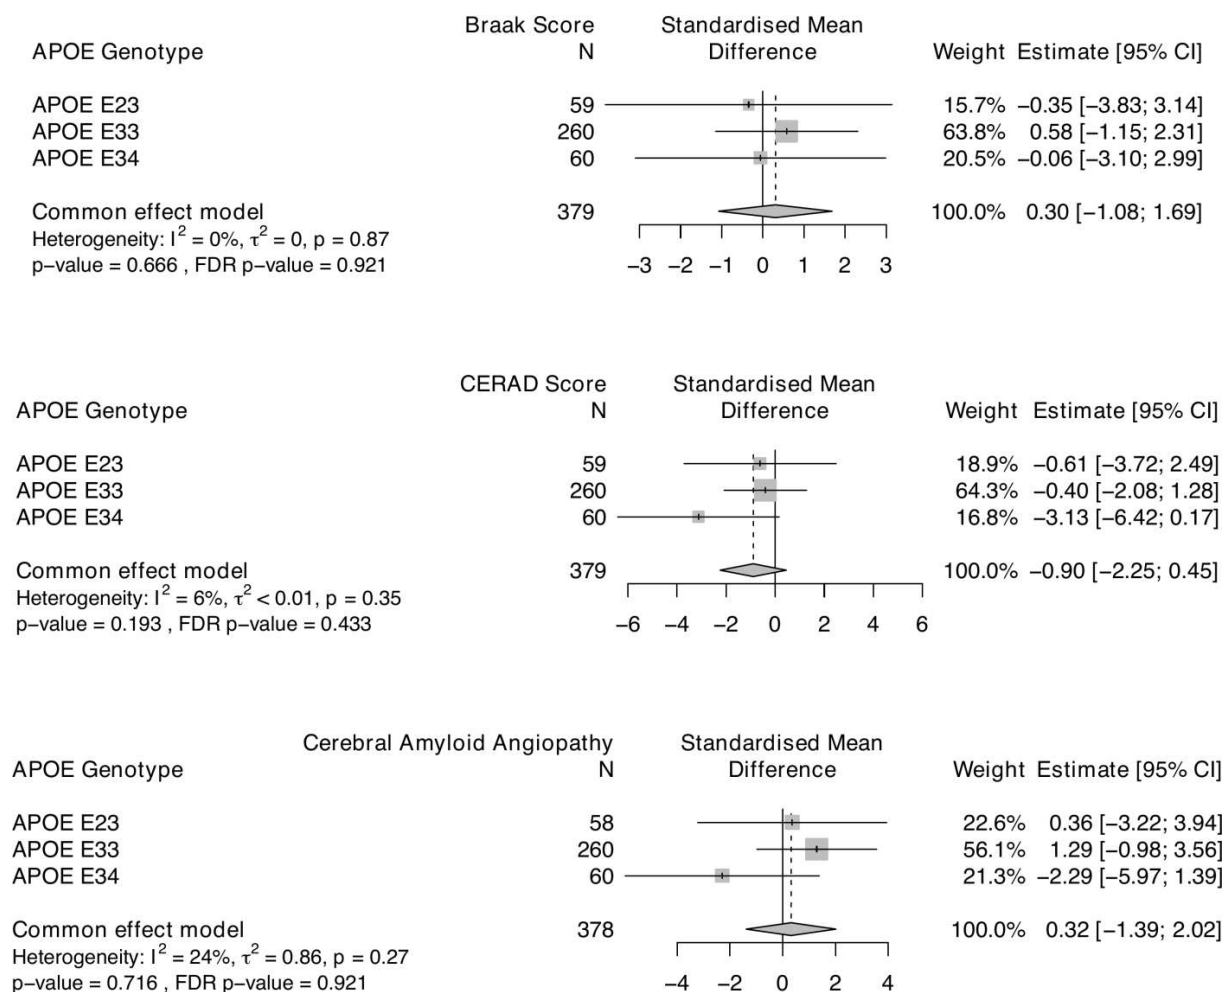

Supplementary Figure 7 – part 2 of 4

## The Relationship between HDL-C and Neuropathology

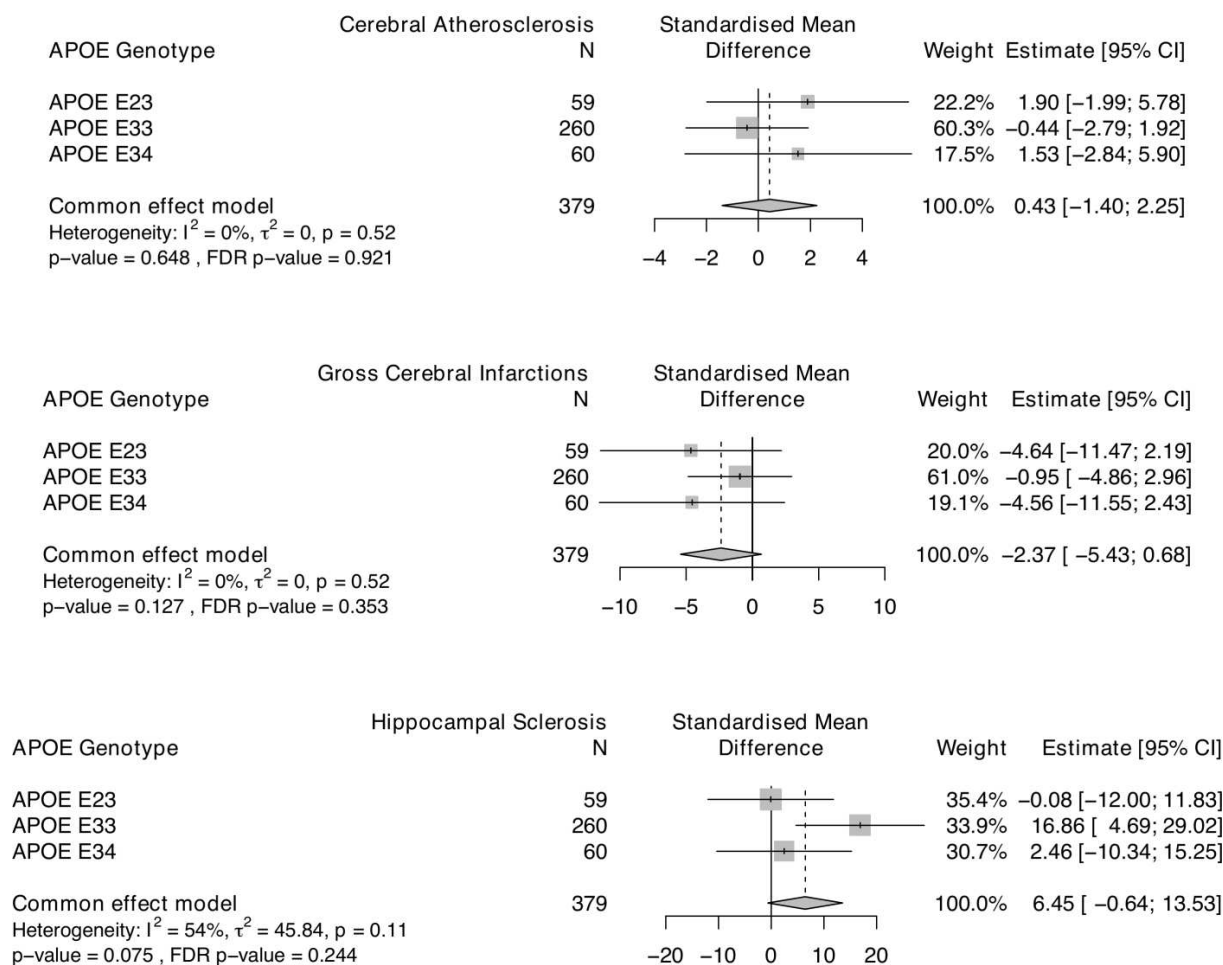

Supplementary Figure 7 – part 3 of 4

## The Relationship between HDL-C and Neuropathology

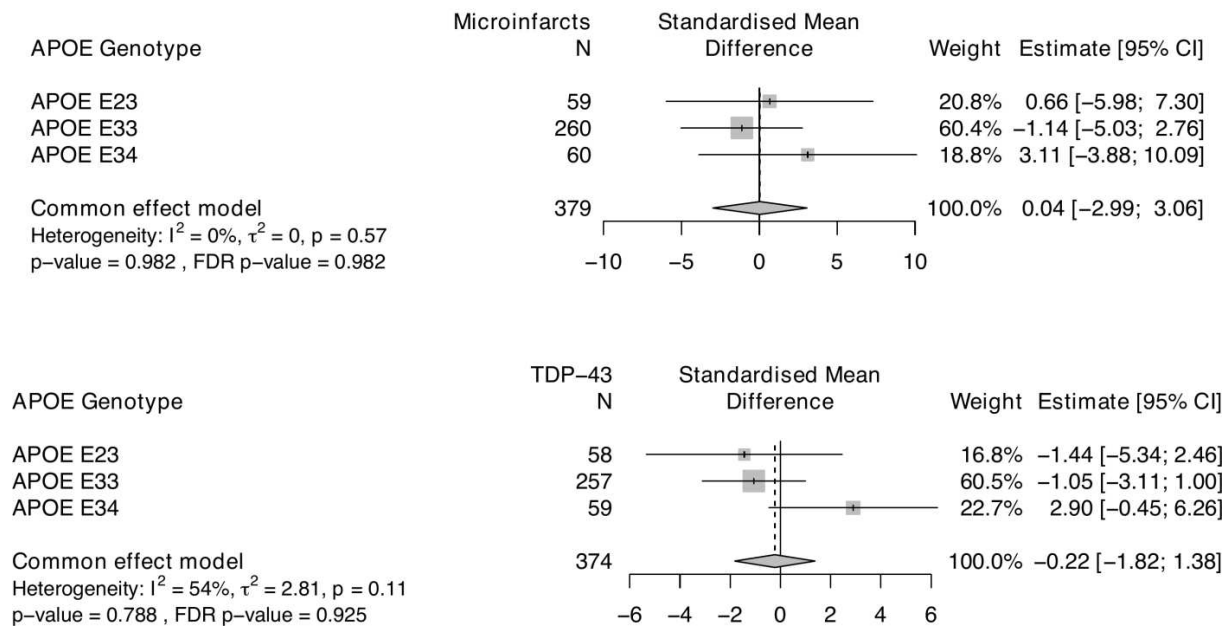

Supplementary Figure 7 – part 4 of 4

**Supplementary Figure 8.** Results for association testing between longitudinally measured TG and neuropathologies in individuals with NCI at baseline with censoring of TG levels for a diagnosis of either MCI or dementia. Each neuropathology was considered in a separate linear mixed model stratified by *APOE* genotype and adjusted for relevant covariates. Final significance was determined by meta-analysis and is shown in by forest plot following the same layout as described in Supplementary Figure 1.

### The Relationship between TG and Neuropathology

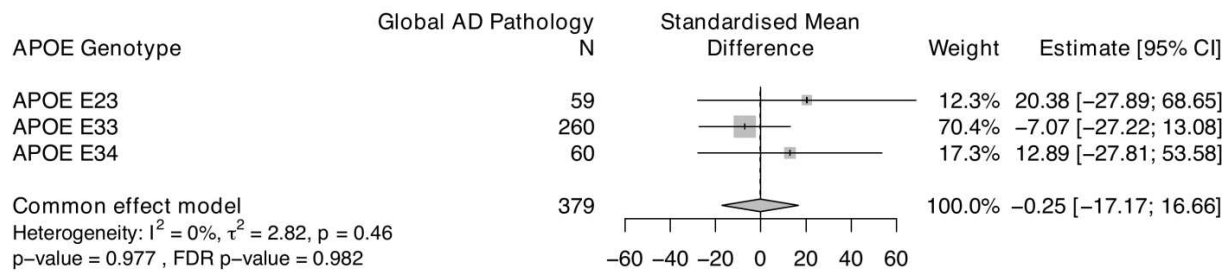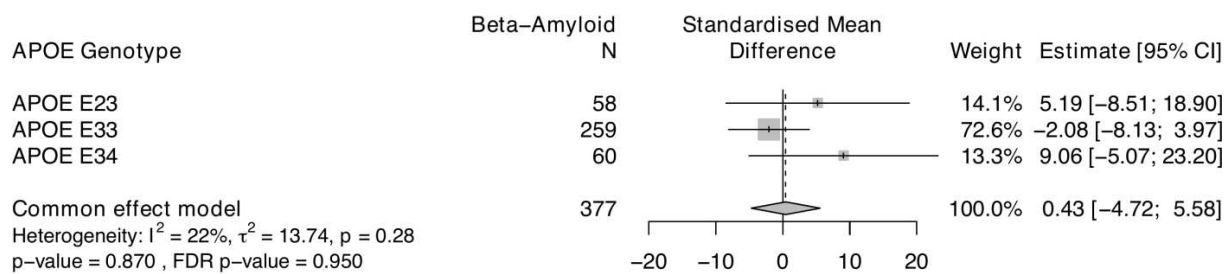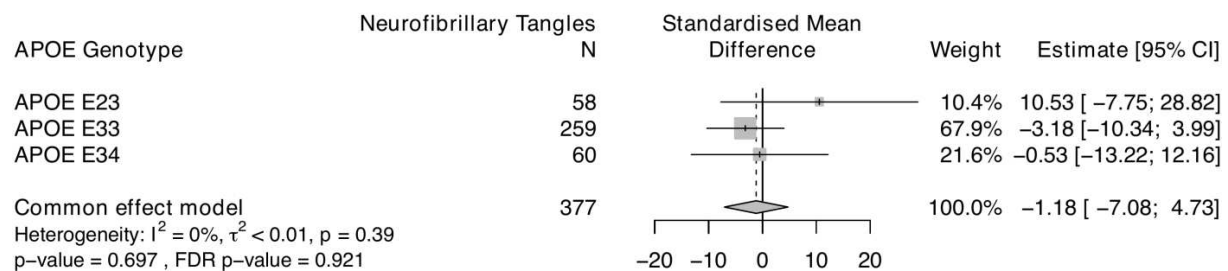

Supplementary Figure 8 – part 1 of 4



## The Relationship between TG and Neuropathology

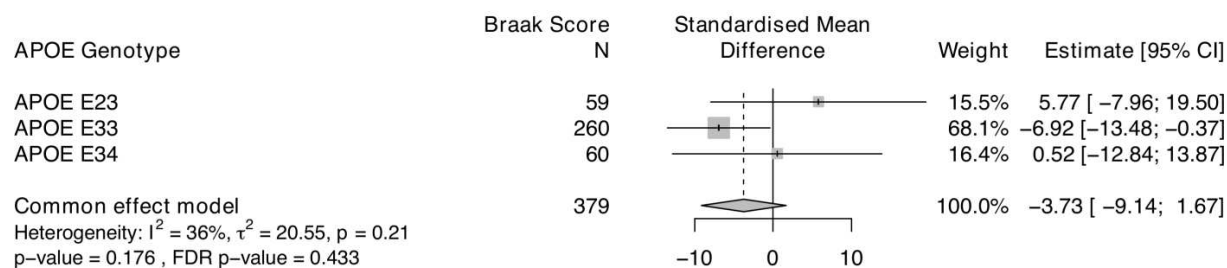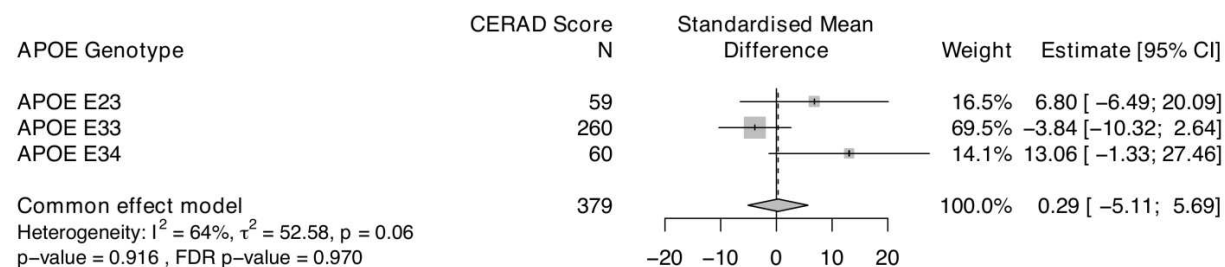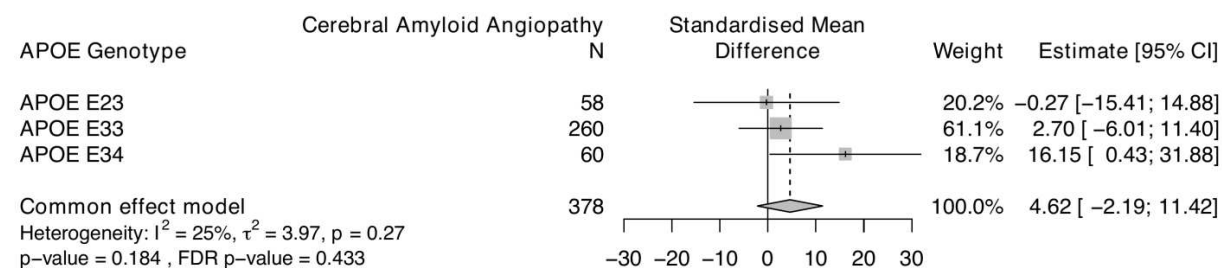

Supplementary Figure 8 – part 2 of 4

## The Relationship between TG and Neuropathology

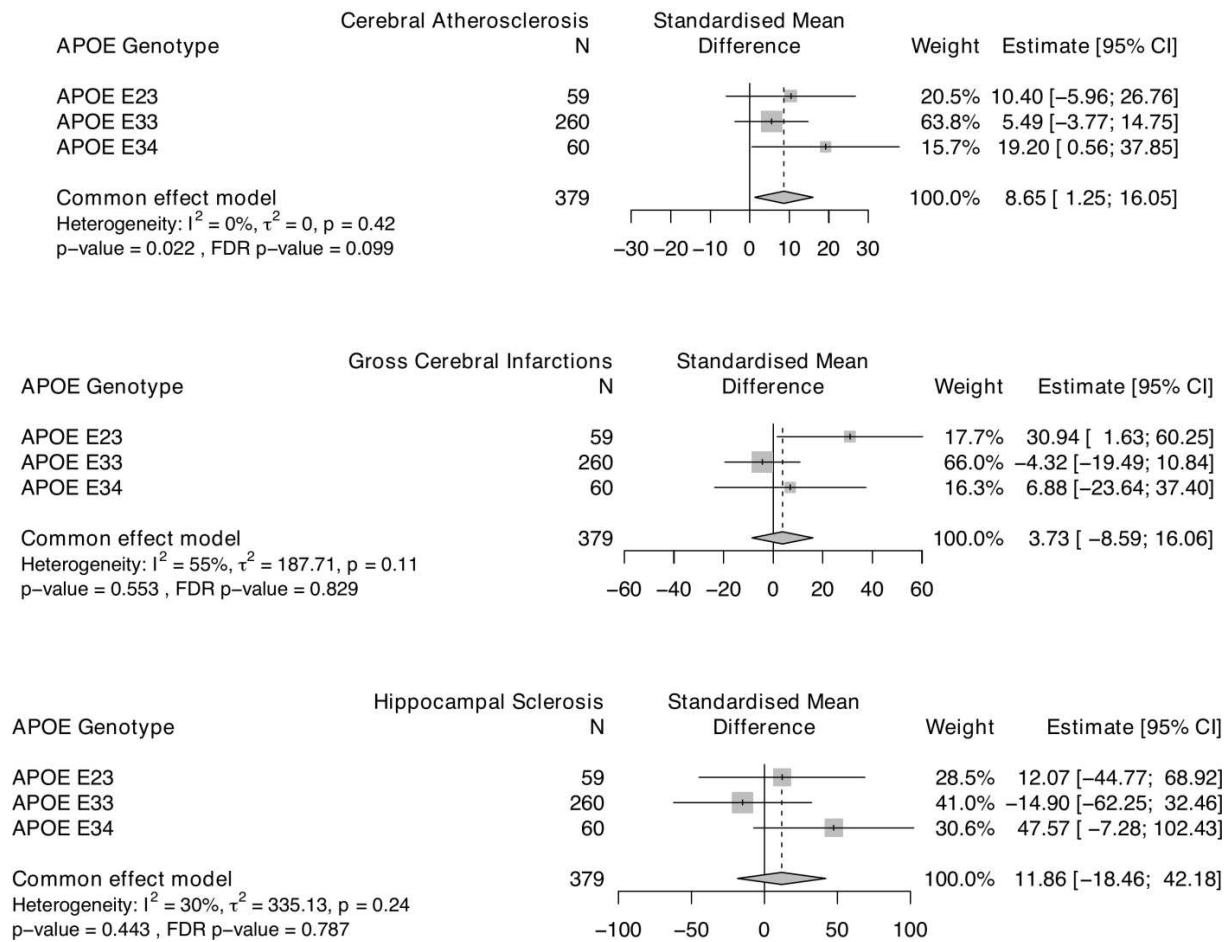

Supplementary Figure 8 – part 3 of 4

## The Relationship between TG and Neuropathology

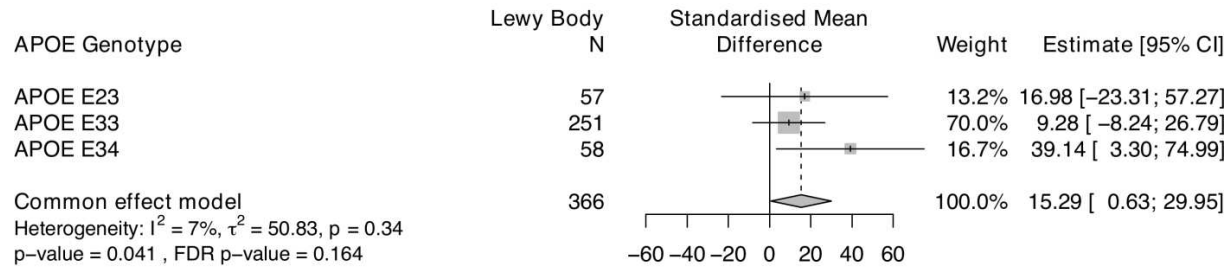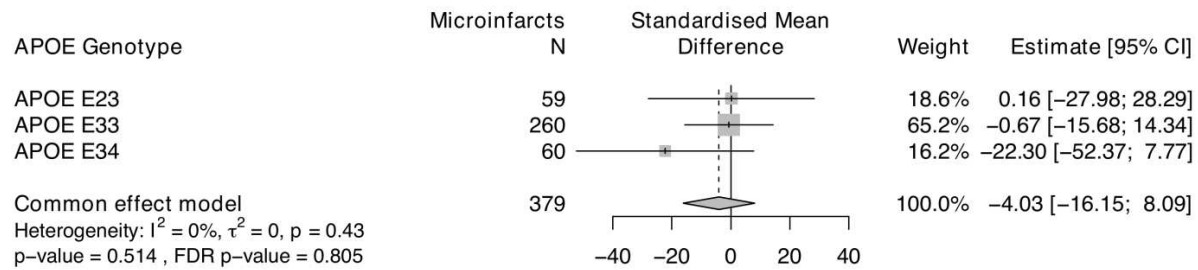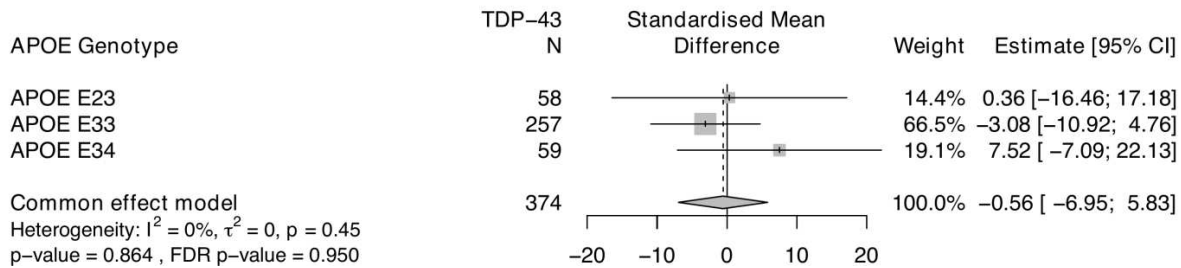

Supplementary Figure 8 – part 4 of 4

**Supplementary Figure 9.** Results for significant association testing between longitudinally measured LDL-C and neuropathologies in all individuals with antemortem blood lipids and neuropathology data without censoring of lipid values based on diagnosis. Each neuropathology was considered in a separate linear mixed model stratified by *APOE* genotype and adjusted for relevant covariates. Final significance was determined by meta-analysis and is shown in by forest plot following the same layout as described in Supplementary Figure 1.

### The Relationship between LDL-C and Neuropathology

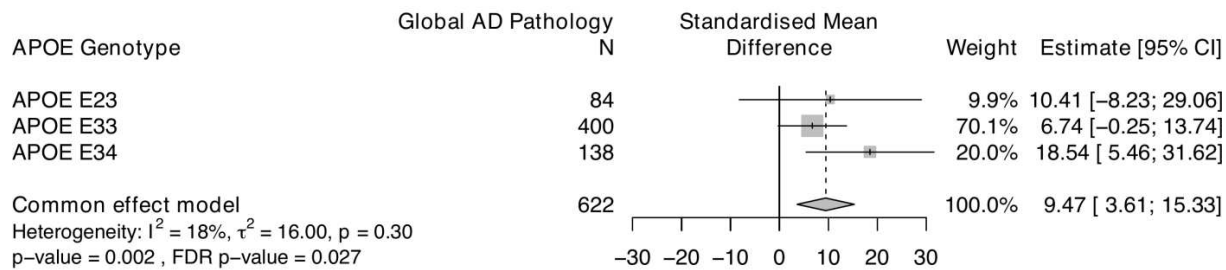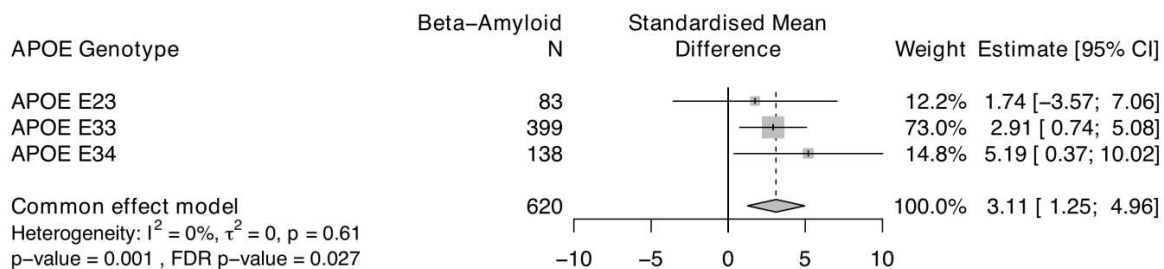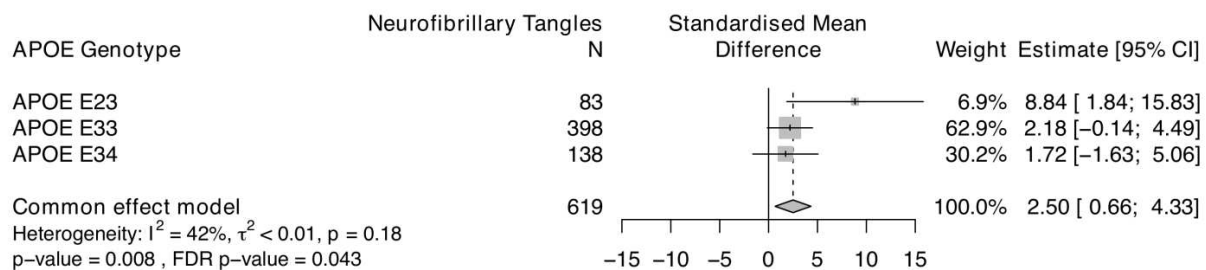

Supplementary Figure 9 – part 1 of 2

The Relationship between LDL-C and Neuropathology

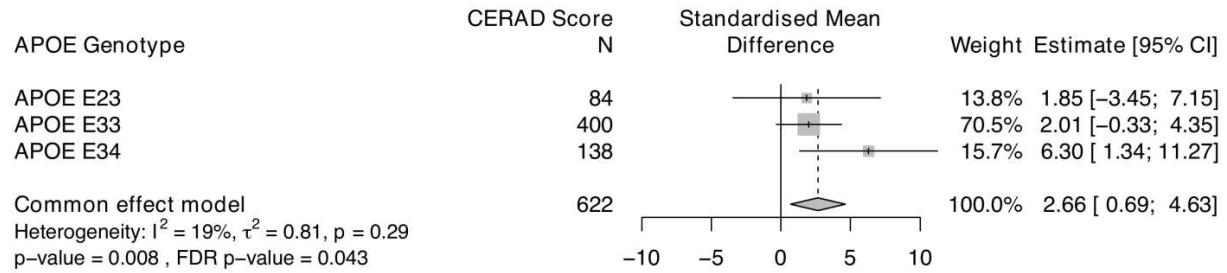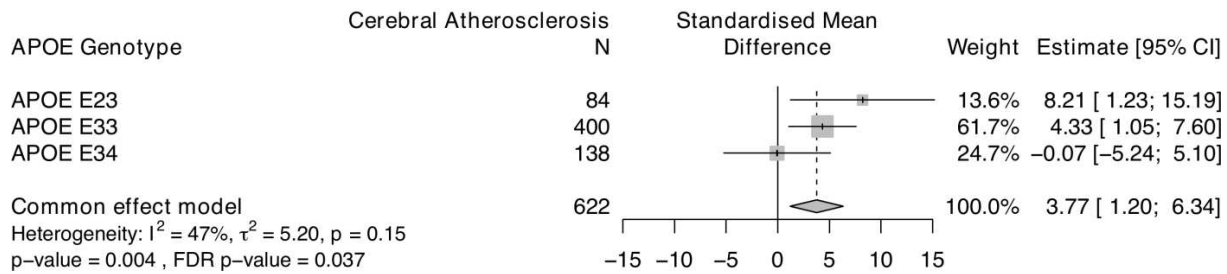

Supplementary Figure 9 – part 2 of 2

**Supplementary Figure 10.** Results for non-significant association testing between longitudinally measured LDL-C and neuropathologies in all individuals with antemortem blood lipids and neuropathology data without censoring of lipid values based on diagnosis. Each neuropathology was considered in a separate linear mixed model stratified by *APOE* genotype and adjusted for relevant covariates. Final significance was determined by meta-analysis and is shown in by forest plot following the same layout as described in Supplementary Figure 1.

### The Relationship between LDL-C and Neuropathology

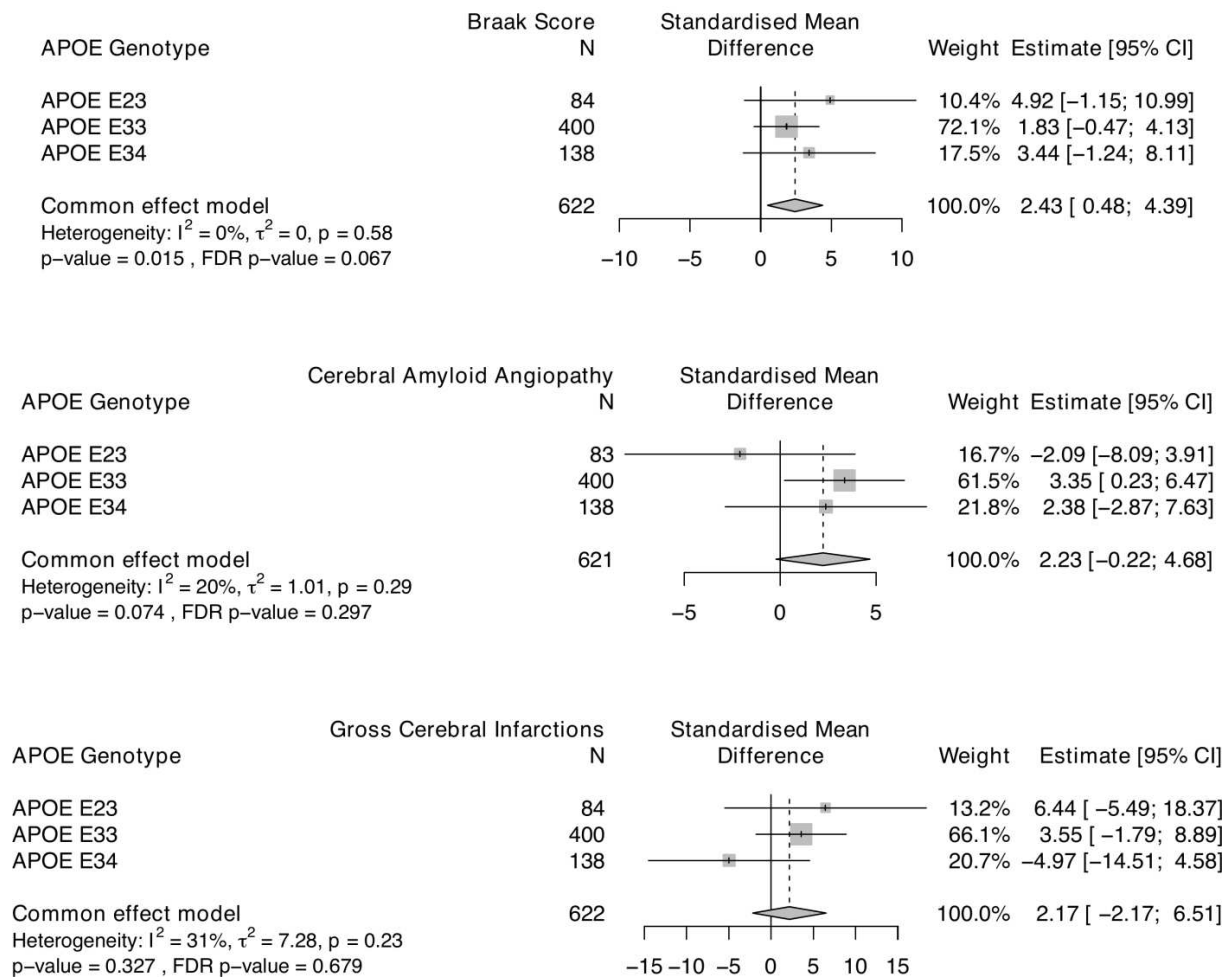

Supplementary Figure 10 – part 1 of 3



## The Relationship between LDL-C and Neuropathology

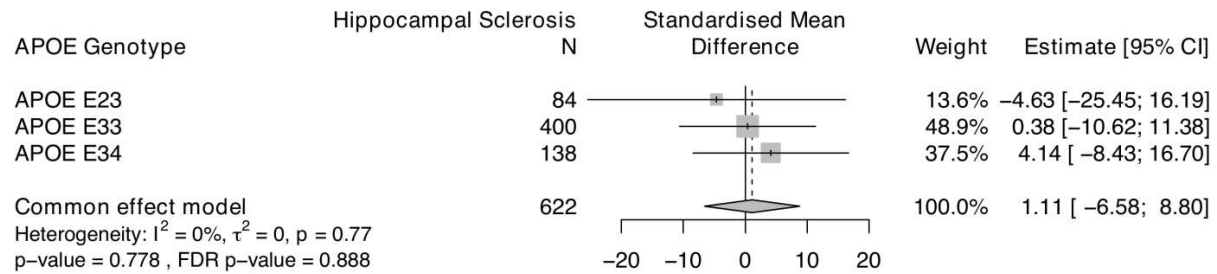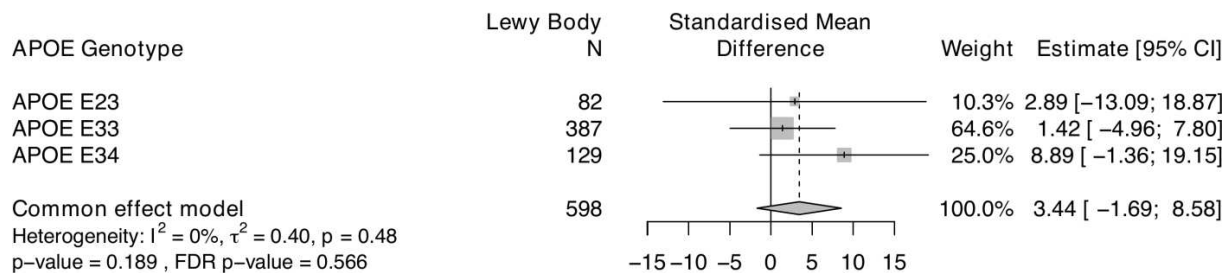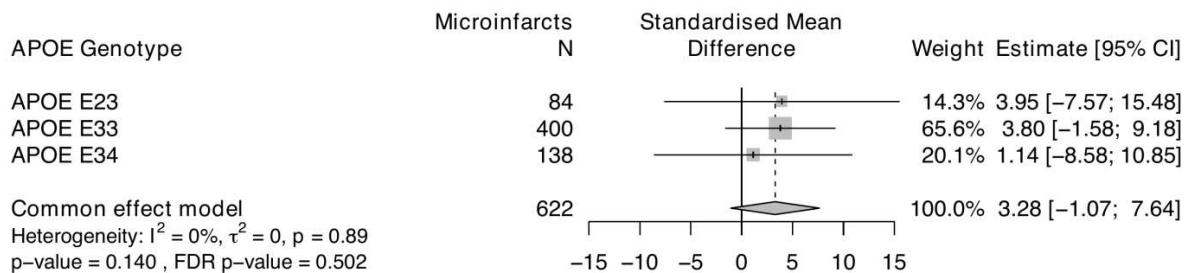

## Supplementary Figure 10 – part 2 of 3

## The Relationship between LDL-C and Neuropathology

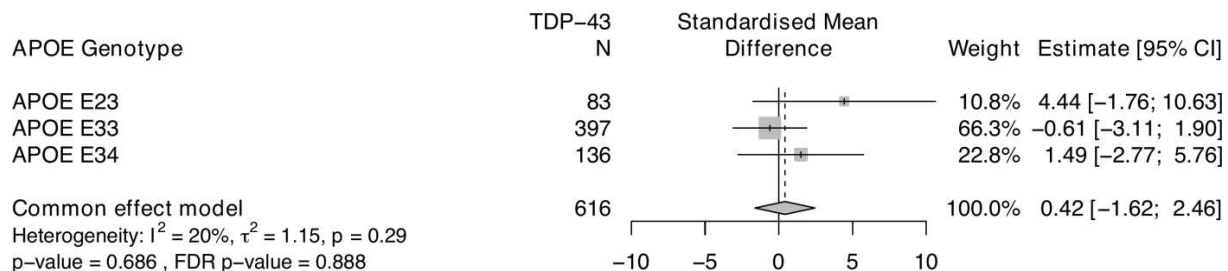

## Supplementary Figure 10 – part 3 of 3

**Supplementary Figure 11.** Results for significant association testing between longitudinally measured HDL-C and neuropathologies in all individuals with antemortem blood lipids and neuropathology data without censoring of lipid values based on diagnosis. Each neuropathology was considered in a separate linear mixed model stratified by *APOE* genotype and adjusted for relevant covariates. Final significance was determined by meta-analysis and is shown in by forest plot following the same layout as described in Supplementary Figure 1.

The Relationship between HDL-C and Neuropathology

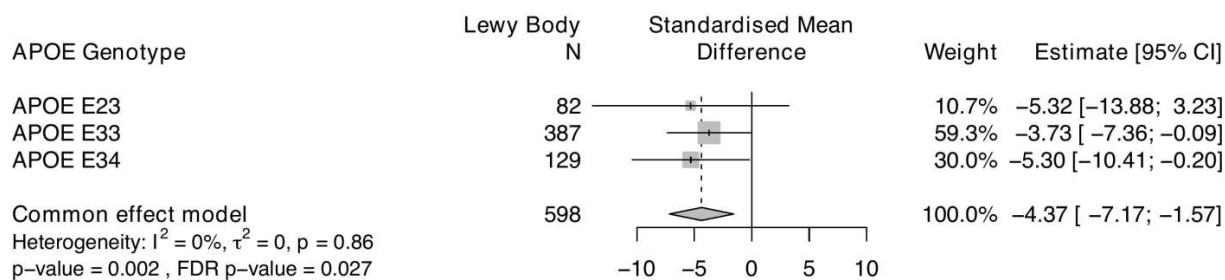

Supplementary Figure 11

**Supplementary Figure 12.** Results for non-significant association testing between longitudinally measured HDL-C and neuropathologies in all individuals with antemortem blood lipids and neuropathology data without censoring of lipid values based on diagnosis. Each neuropathology was considered in a separate linear mixed model stratified by *APOE* genotype and adjusted for relevant covariates. Final significance was determined by meta-analysis and is shown in by forest plot following the same layout as described in Supplementary Figure 1.

### The Relationship between HDL-C and Neuropathology

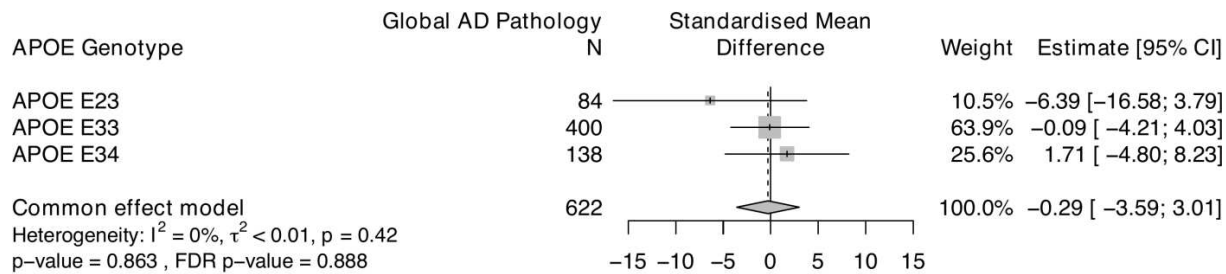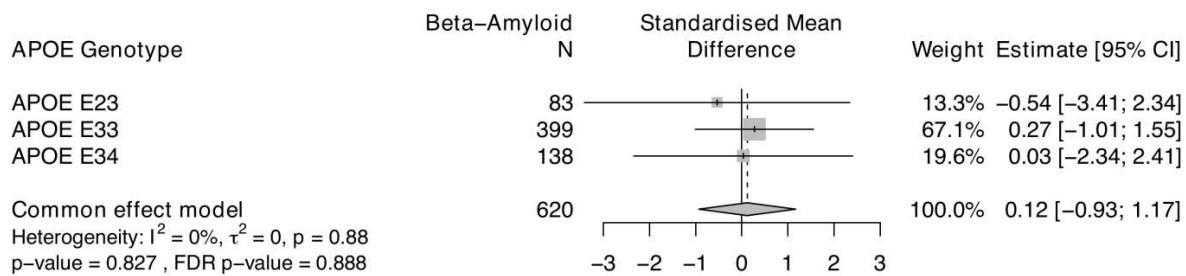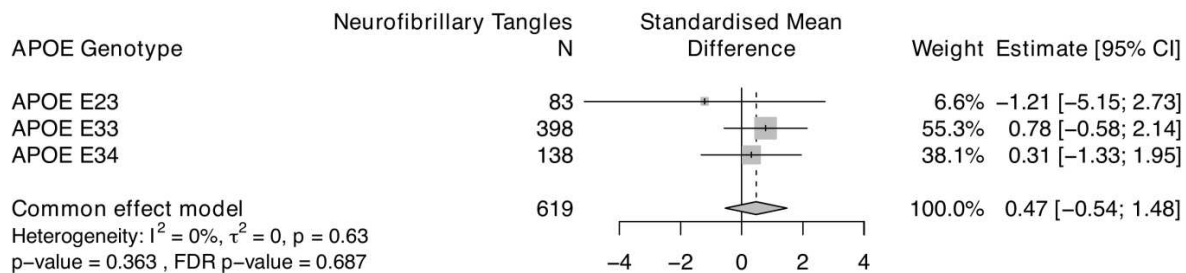

Supplementary Figure 12 – part 1 of 4

## The Relationship between HDL-C and Neuropathology

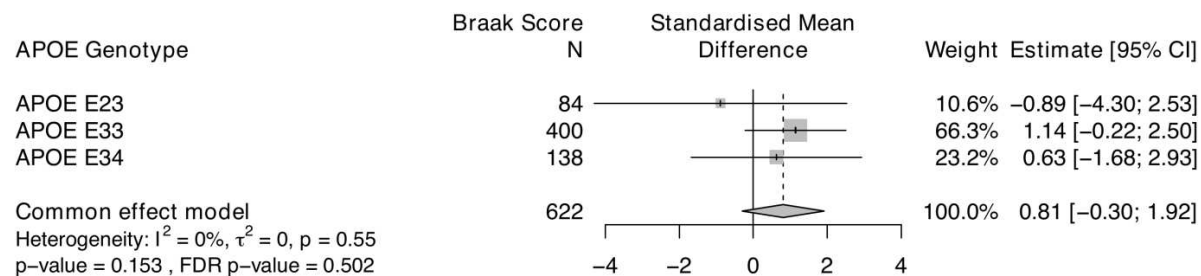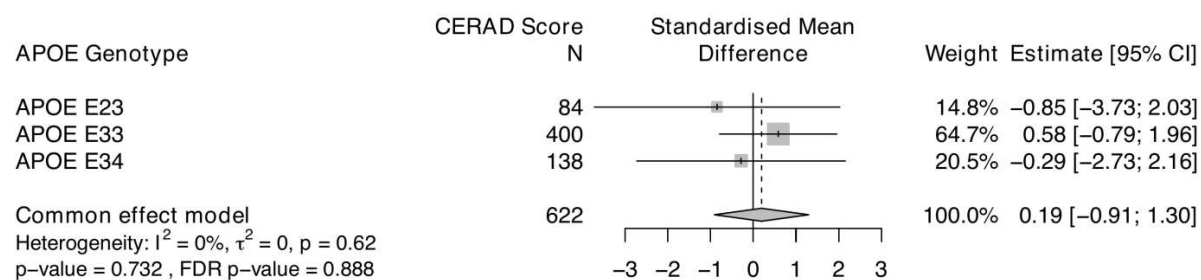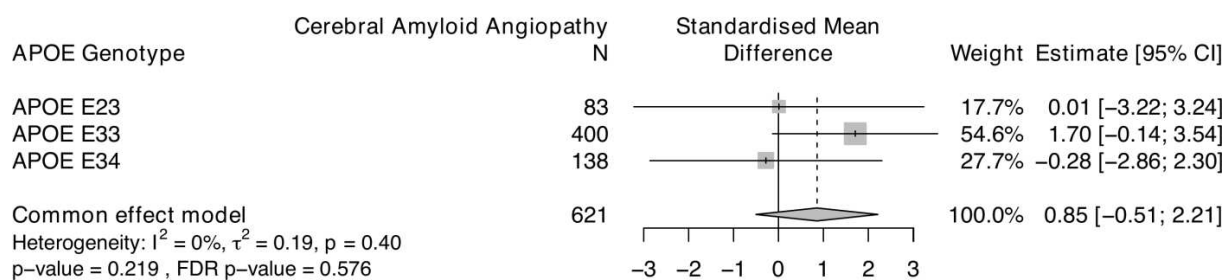

Supplementary Figure 12 – part 2 of 4

## The Relationship between HDL-C and Neuropathology

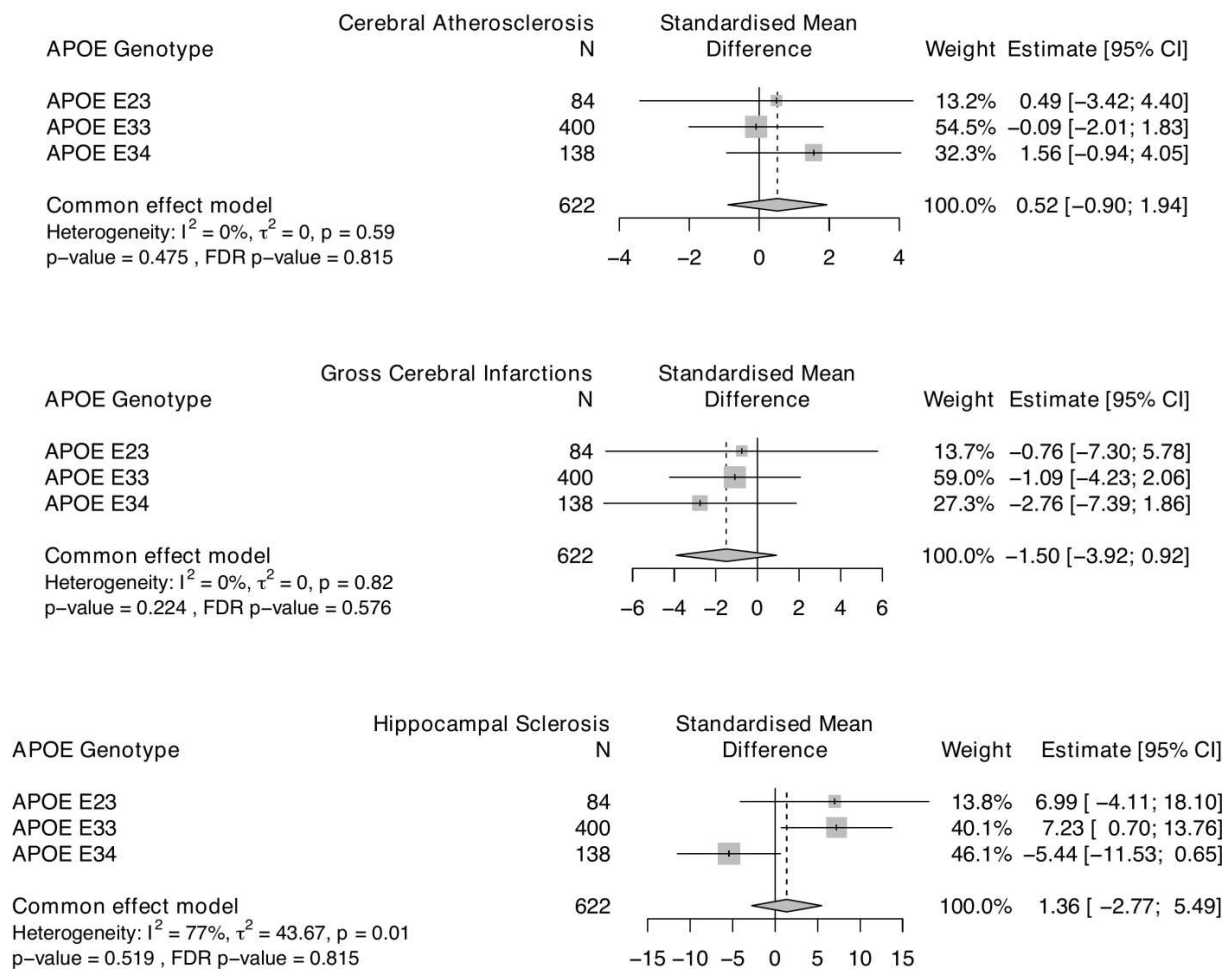

Supplementary Figure 12 – part 3 of 4

## The Relationship between HDL-C and Neuropathology

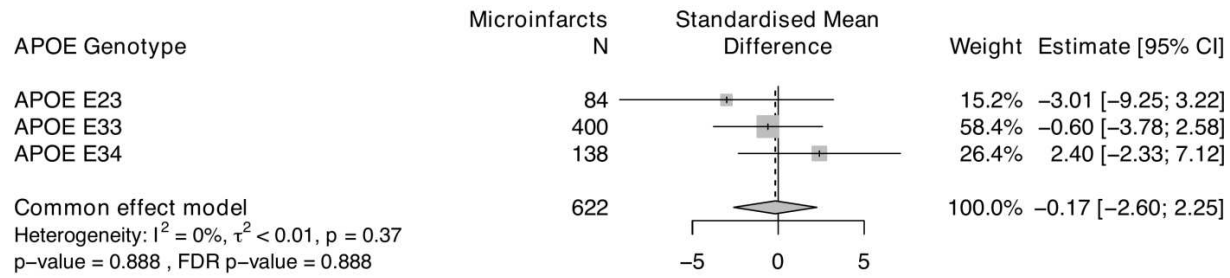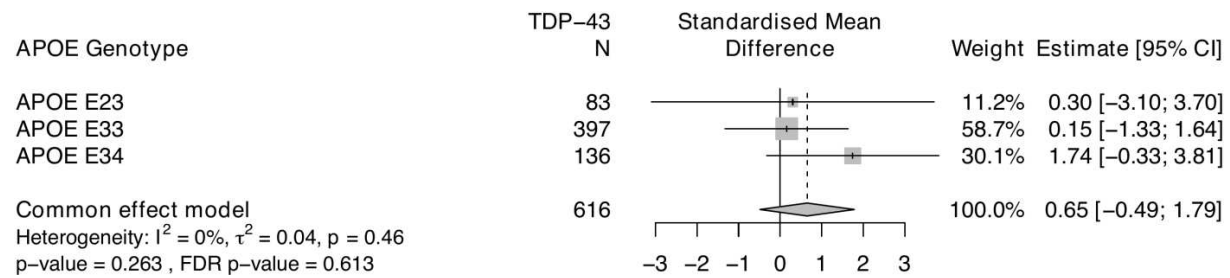

Supplementary Figure 12 – part 4 of 4



**Supplementary Figure 13.** Results for significant association testing between longitudinally measured TG and neuropathologies in all individuals with antemortem blood lipids and neuropathology data without censoring of lipid values based on diagnosis. Each neuropathology was considered in a separate linear mixed model stratified by *APOE* genotype and adjusted for relevant covariates. Final significance was determined by meta-analysis and is shown in by forest plot following the same layout as described in Supplementary Figure 1.

#### The Relationship between TG and Neuropathology

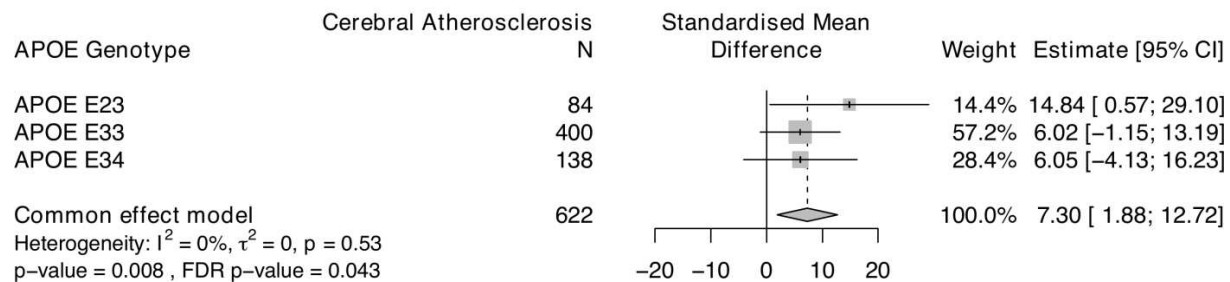

*Supplementary Figure 13*

**Supplementary Figure 14.** Results for non-significant association testing between longitudinally measured TG and neuropathologies in all individuals with antemortem blood lipids and neuropathology data without censoring of lipid values based on diagnosis. Each neuropathology was considered in a separate linear mixed model stratified by *APOE* genotype and adjusted for relevant covariates. Final significance was determined by meta-analysis and is shown in by forest plot following the same layout as described in Supplementary Figure 1.

#### The Relationship between TG and Neuropathology

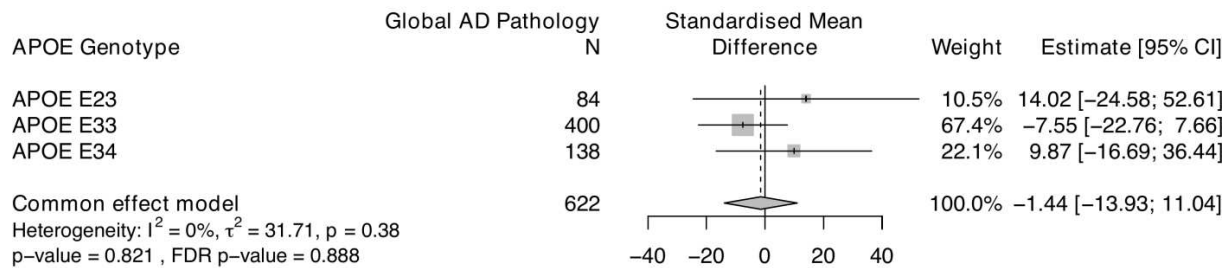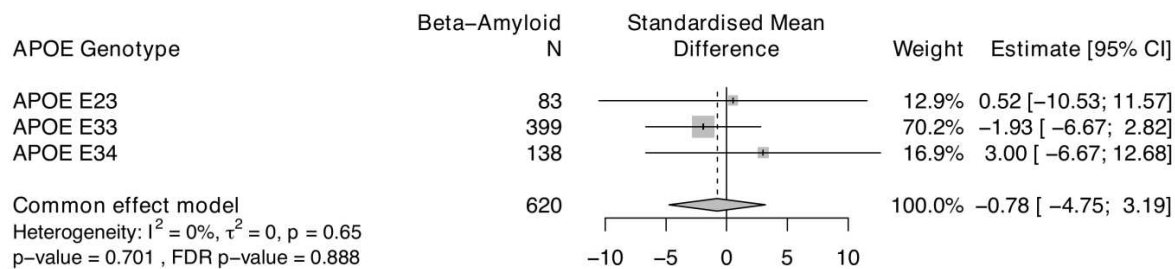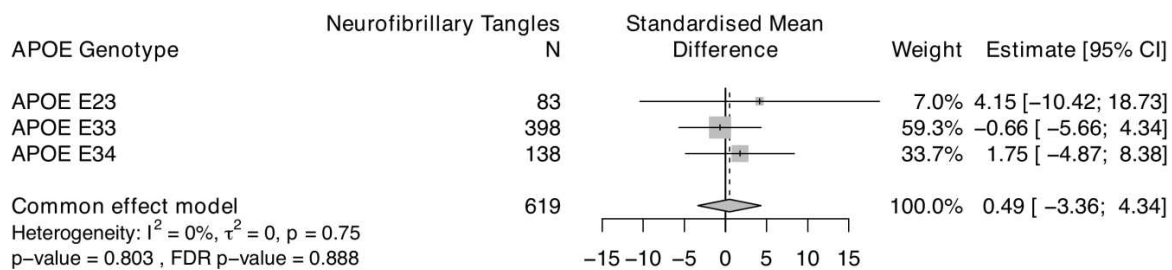

Supplementary Figure 14 – part 1 of 4

## The Relationship between TG and Neuropathology

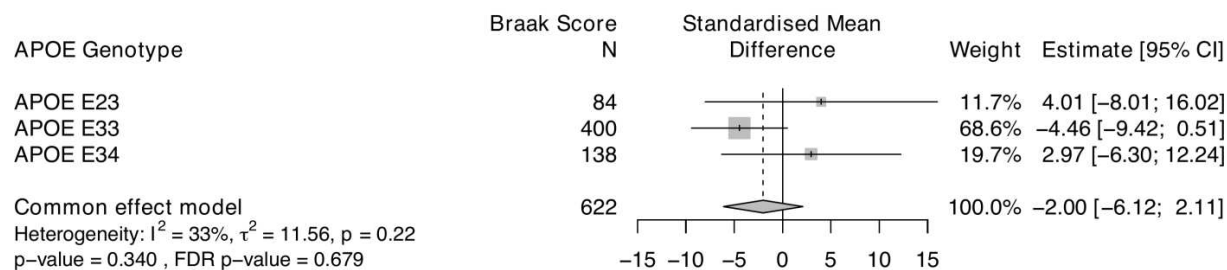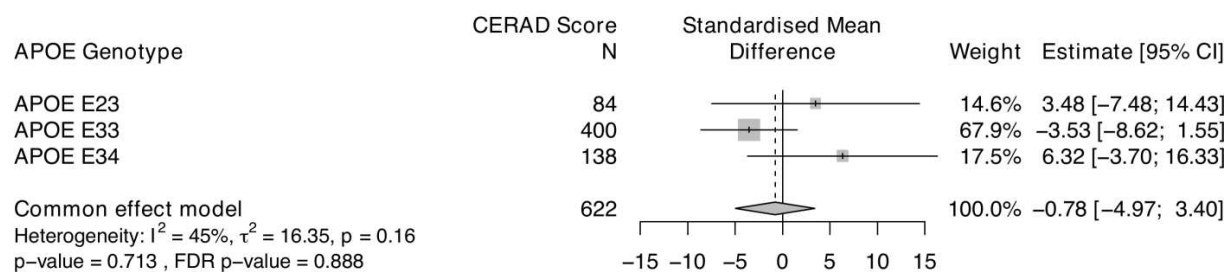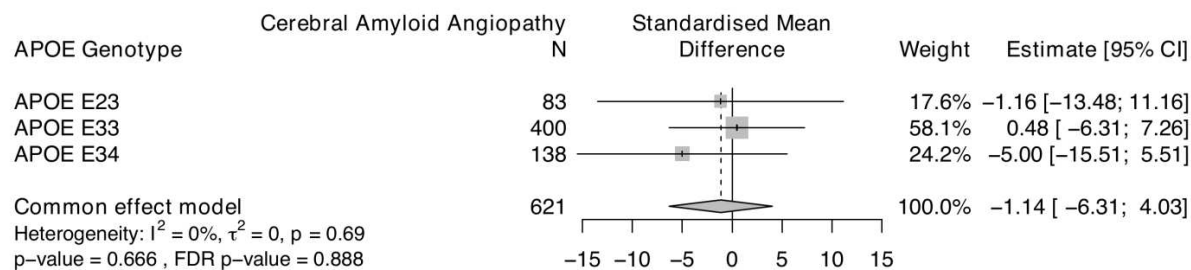

Supplementary Figure 14 – part 2 of 4

## The Relationship between TG and Neuropathology

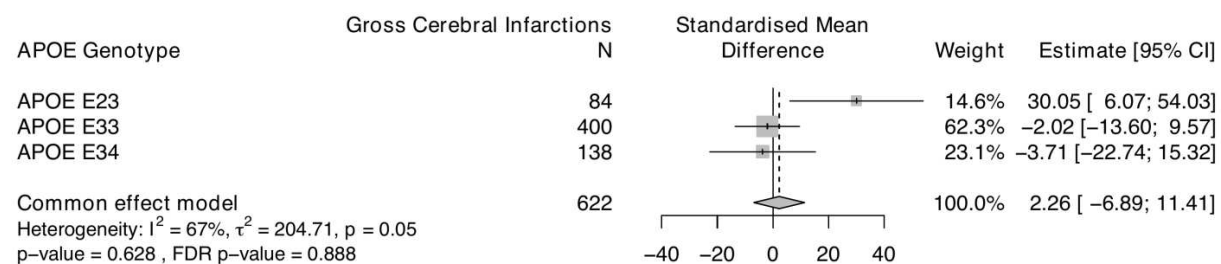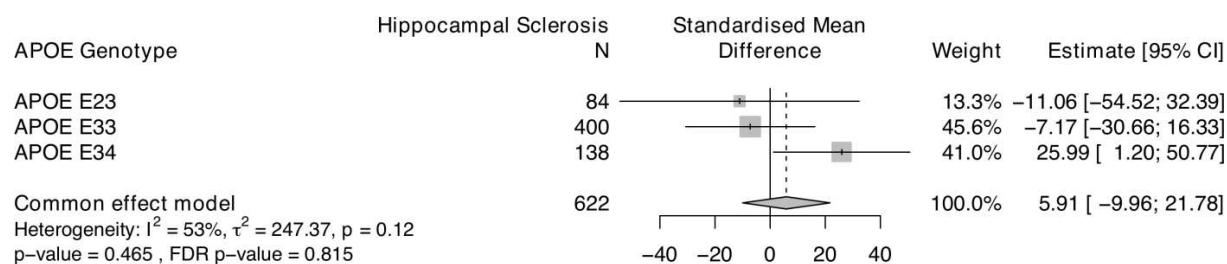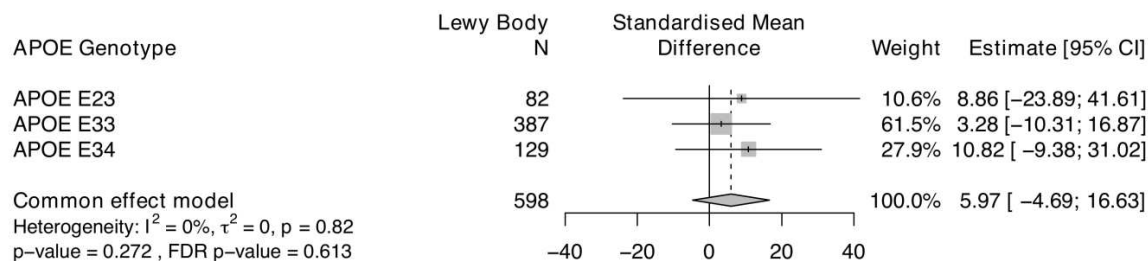

Supplementary Figure 14 – part 3 of 4

## The Relationship between TG and Neuropathology

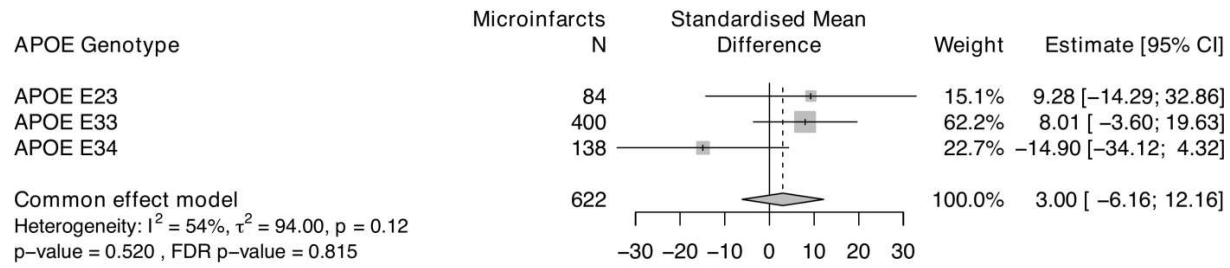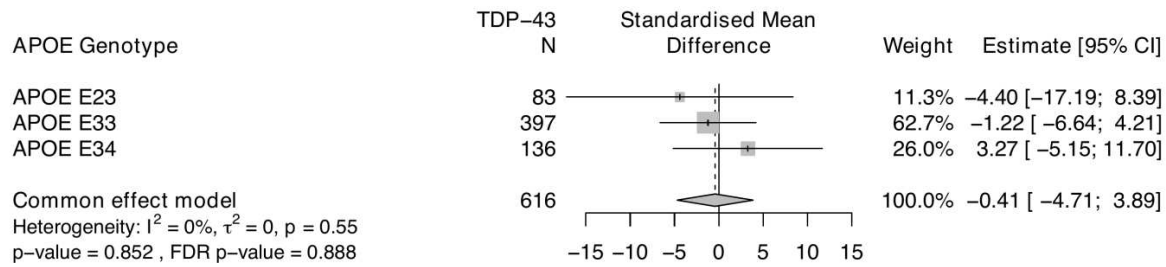

Supplementary Figure 14 – part 4 of 4
